# Supplementary material for: Simulating CH 4 and CO 2 over South and East Asia using the zoomed chemistry transport model LMDzINCA
Source: Copernicus journal article supplement (doi:10.5194/acp-2016-1056), 2017-03-07
Supplement: Supplementary file 1 [file acp-2016-1056-supplement.pdf]

**Table S1** The mean bias ( $\pm$ s.d.) and RMSE of the simulated CH<sub>4</sub> (CO<sub>2</sub>) annual gradient for all the stations and different station groups. Results from both ZASIA and REG are presented. Statistics are given for stations within the zoomed region and outside the zoomed region.

| CH <sub>4</sub> (ppb) |          | All       |           | Marine   |           | Coastal   |            | Mountain |          | Continental |          |
|-----------------------|----------|-----------|-----------|----------|-----------|-----------|------------|----------|----------|-------------|----------|
|                       |          | ZASIA     | REG       | ZASIA    | REG       | ZASIA     | REG        | ZASIA    | REG      | ZASIA       | REG      |
| Bias                  | Zoom     | -1.2±13.9 | -5.4±20.1 | 2.8±17.9 | -2.1±24.7 | -3.1±15.3 | -12.3±19.4 | 2.1±10.1 | -3.6±2.0 | -8.1±9.4    | 2.9±31.5 |
|                       | Non zoom | -8.5±12.2 | -9.2±6.4  | -3.0±2.1 | -4.2±0.2  | -5.0±8.4  | -11.4±3.7  | –        | –        | -32.0       | -19.6    |
| RMSE                  | Zoom     | 13.6      | 20.3      | 16.3     | 22.2      | 14.5      | 21.7       | 9.0      | 4.0      | 11.2        | 25.9     |
|                       | Non zoom | 14.0      | 10.9      | 3.5      | 4.2       | 7.8       | 11.7       | –        | –        | 32.0        | 19.6     |
| CO <sub>2</sub> (ppm) |          | All       |           | Marine   |           | Coastal   |            | Mountain |          | Continental |          |
|                       |          | ZASIA     | REG       | ZASIA    | REG       | ZASIA     | REG        | ZASIA    | REG      | ZASIA       | REG      |
| Bias                  | Zoom     | 0.3±2.4   | 0.0±2.5   | 0.0±1.5  | 0.1±1.3   | 1.4±3.0   | 0.3±3.3    | -0.7±3.7 | -0.9±3.9 | 0.0±1.1     | 0.3±1.7  |
|                       | Non zoom | -1.2±2.4  | -0.5±1.9  | -0.6±0.2 | -0.5±0.0  | -0.8      | -1.7       | –        | –        | -1.9±3.9    | -0.1±3.1 |
| RMSE                  | Zoom     | 2.4       | 2.5       | 1.3      | 1.1       | 3.1       | 3.1        | 3.3      | 3.5      | 1.0         | 1.6      |
|                       | Non zoom | 2.5       | 1.8       | 0.6      | 0.5       | 0.8       | 1.7        | –        | –        | 3.7         | 2.5      |

**Table S2** The correlation between the simulated and observed CH<sub>4</sub> diurnal cycles for stations that have continuous CH<sub>4</sub> measurements. Correlation coefficients are given for all the sampling days with a complete 24-hour profile and for different months (M1–M12).

|     |       | AMY  | BKT   | COI  | GSN   | HAT   | HLE   | MNM   | PON   | RYO   | YON   |
|-----|-------|------|-------|------|-------|-------|-------|-------|-------|-------|-------|
| All | ZASIA | 0.64 | 0.27  | 0.53 | 0.31  | 0.22  | 0.35  | 0.22  | 0.19  | 0.20  | 0.40  |
|     | RGL   | 0.56 | -0.12 | 0.56 | 0.09  | 0.03  | 0.22  | 0.24  | 0.21  | 0.32  | 0.19  |
| M1  | ZASIA | 0.66 | 0.62  | 0.75 | 0.60  | 0.45  | 0.18  | 0.45  | 0.09  | 0.47  | 0.19  |
|     | RGL   | 0.50 | 0.45  | 0.63 | 0.52  | 0.12  | -0.21 | 0.35  | 0.38  | 0.23  | 0.18  |
| M2  | ZASIA | 0.11 | 0.16  | 0.61 | 0.49  | 0.17  | 0.54  | 0.02  | 0.05  | 0.21  | 0.45  |
|     | RGL   | 0.19 | 0.16  | 0.40 | 0.32  | -0.29 | 0.28  | 0.36  | 0.46  | 0.25  | 0.00  |
| M3  | ZASIA | 0.60 | 0.68  | 0.74 | 0.55  | 0.11  | n.a.  | 0.01  | 0.27  | 0.20  | 0.53  |
|     | RGL   | 0.56 | 0.39  | 0.77 | 0.53  | -0.44 | n.a.  | 0.06  | 0.43  | -0.06 | 0.02  |
| M4  | ZASIA | 0.50 | -0.06 | 0.67 | 0.41  | -0.10 | n.a.  | 0.45  | 0.54  | 0.35  | 0.48  |
|     | RGL   | 0.43 | -0.40 | 0.61 | -0.17 | -0.24 | n.a.  | 0.13  | 0.70  | 0.48  | 0.13  |
| M5  | ZASIA | 0.43 | -0.03 | 0.40 | 0.57  | 0.22  | n.a.  | 0.28  | 0.67  | 0.38  | 0.03  |
|     | RGL   | 0.29 | -0.54 | 0.64 | -0.04 | -0.16 | n.a.  | 0.25  | 0.58  | 0.31  | -0.09 |
| M6  | ZASIA | 0.85 | -0.37 | 0.55 | 0.39  | 0.15  | n.a.  | 0.26  | n.a.  | -0.34 | 0.26  |
|     | RGL   | 0.70 | -0.38 | 0.66 | 0.15  | -0.19 | n.a.  | 0.30  | n.a.  | -0.16 | -0.07 |
| M7  | ZASIA | 0.64 | -0.28 | 0.67 | 0.02  | 0.34  | 0.82  | 0.37  | n.a.  | 0.19  | -0.12 |
|     | RGL   | 0.53 | -0.35 | 0.72 | -0.13 | 0.12  | 0.91  | 0.32  | n.a.  | 0.68  | -0.10 |
| M8  | ZASIA | 0.73 | 0.25  | 0.59 | 0.42  | -0.03 | 0.70  | -0.01 | 0.72  | 0.51  | 0.11  |
|     | RGL   | 0.67 | -0.49 | 0.51 | 0.05  | 0.24  | 0.86  | 0.10  | -0.70 | 0.60  | -0.10 |
| M9  | ZASIA | 0.77 | -0.11 | 0.73 | 0.12  | 0.34  | -0.12 | 0.28  | 0.45  | 0.39  | 0.41  |
|     | RGL   | 0.68 | -0.29 | 0.79 | -0.08 | 0.11  | -0.75 | 0.53  | 0.12  | 0.44  | 0.27  |
| M10 | ZASIA | 0.82 | 0.29  | 0.73 | 0.02  | -0.07 | 0.17  | 0.11  | 0.29  | 0.25  | 0.34  |
|     | RGL   | 0.73 | -0.48 | 0.68 | 0.29  | 0.25  | -0.43 | -0.15 | 0.62  | 0.31  | 0.27  |
| M11 | ZASIA | 0.87 | 0.13  | 0.32 | 0.45  | 0.59  | -0.08 | 0.19  | 0.02  | -0.19 | 0.65  |
|     | RGL   | 0.85 | -0.03 | 0.34 | 0.41  | 0.70  | 0.33  | 0.44  | 0.21  | 0.10  | 0.64  |
| M12 | ZASIA | 0.64 | 0.28  | 0.43 | -0.04 | 0.45  | 0.68  | 0.22  | 0.08  | 0.49  | 0.71  |
|     | RGL   | 0.62 | -0.51 | 0.48 | -0.19 | 0.27  | 0.70  | 0.09  | 0.08  | 0.31  | 0.42  |

**Table S3** The correlation between the simulated and observed CO<sub>2</sub> diurnal cycles for stations that have continuous CO<sub>2</sub> measurements. Correlation coefficients are given for all the sampling days with a complete 24-hour profile and for different months (M1–M12).

|     |       | AMY   | BKT   | DDR   | GSN   | HLE   | KIS   | MKW  | MNM   | PON   | RYO   | YON   |
|-----|-------|-------|-------|-------|-------|-------|-------|------|-------|-------|-------|-------|
| All | ZASIA | 0.30  | 0.23  | -0.35 | 0.17  | -0.12 | 0.79  | 0.65 | 0.13  | 0.33  | 0.51  | -0.05 |
|     | RGL   | 0.19  | -0.19 | -0.34 | 0.09  | 0.16  | 0.78  | 0.69 | 0.13  | 0.23  | 0.39  | 0.32  |
| M1  | ZASIA | 0.00  | 0.56  | 0.63  | 0.53  | -0.36 | 0.35  | 0.41 | 0.41  | 0.89  | 0.26  | 0.01  |
|     | RGL   | 0.15  | 0.28  | 0.78  | 0.25  | -0.15 | -0.07 | 0.11 | 0.37  | 0.55  | 0.15  | 0.36  |
| M2  | ZASIA | 0.14  | 0.24  | 0.65  | 0.38  | -0.19 | 0.44  | 0.37 | 0.22  | 0.81  | 0.12  | -0.17 |
|     | RGL   | 0.24  | -0.10 | 0.63  | 0.06  | 0.07  | 0.30  | 0.01 | 0.03  | 0.39  | 0.09  | 0.44  |
| M3  | ZASIA | 0.15  | 0.32  | 0.37  | 0.55  | -0.03 | 0.61  | 0.37 | 0.13  | 0.22  | 0.07  | 0.06  |
|     | RGL   | -0.43 | -0.19 | 0.15  | 0.52  | 0.06  | 0.55  | 0.16 | 0.28  | 0.44  | -0.47 | 0.05  |
| M4  | ZASIA | 0.25  | 0.39  | 0.00  | 0.09  | 0.25  | 0.90  | 0.68 | 0.33  | 0.50  | 0.32  | 0.21  |
|     | RGL   | 0.10  | -0.22 | -0.16 | -0.14 | 0.21  | 0.81  | 0.47 | -0.28 | 0.67  | 0.28  | 0.47  |
| M5  | ZASIA | 0.03  | 0.36  | -0.58 | 0.25  | 0.31  | 0.82  | 0.82 | -0.15 | 0.88  | 0.48  | -0.25 |
|     | RGL   | 0.22  | -0.28 | -0.62 | -0.01 | 0.41  | 0.80  | 0.76 | 0.05  | 0.68  | 0.50  | 0.46  |
| M6  | ZASIA | 0.63  | 0.04  | -0.68 | 0.14  | 0.33  | 0.83  | 0.91 | -0.08 | n.a.  | 0.44  | -0.47 |
|     | RGL   | 0.64  | -0.29 | -0.71 | -0.22 | 0.21  | 0.86  | 0.88 | -0.12 | n.a.  | 0.66  | 0.40  |
| M7  | ZASIA | 0.58  | 0.16  | -0.80 | 0.22  | -0.16 | 0.93  | 0.86 | 0.02  | n.a.  | 0.65  | -0.64 |
|     | RGL   | 0.67  | -0.05 | -0.80 | 0.05  | 0.38  | 0.84  | 0.79 | -0.04 | n.a.  | 0.55  | 0.34  |
| M8  | ZASIA | -0.07 | 0.15  | -0.82 | -0.05 | 0.22  | 0.93  | 0.87 | -0.01 | 0.82  | 0.65  | -0.59 |
|     | RGL   | -0.24 | 0.10  | -0.82 | -0.07 | 0.40  | 0.92  | 0.77 | -0.03 | -0.77 | 0.39  | 0.16  |
| M9  | ZASIA | 0.77  | 0.27  | -0.49 | 0.03  | -0.63 | 0.92  | 0.84 | -0.05 | 0.66  | 0.45  | -0.13 |
|     | RGL   | 0.57  | -0.14 | -0.61 | 0.10  | 0.00  | 0.90  | 0.78 | 0.22  | 0.06  | 0.20  | 0.35  |
| M10 | ZASIA | 0.32  | -0.10 | 0.01  | 0.25  | -0.51 | 0.72  | 0.70 | 0.20  | 0.31  | 0.39  | 0.21  |
|     | RGL   | 0.22  | -0.60 | -0.11 | 0.37  | 0.15  | 0.83  | 0.48 | 0.17  | 0.89  | 0.09  | 0.54  |
| M11 | ZASIA | 0.19  | 0.14  | 0.37  | -0.13 | -0.29 | 0.55  | 0.53 | 0.36  | 0.18  | 0.22  | 0.35  |
|     | RGL   | 0.23  | -0.47 | 0.46  | -0.01 | 0.04  | 0.65  | 0.13 | 0.59  | 0.53  | 0.24  | 0.65  |
| M12 | ZASIA | 0.11  | 0.26  | 0.53  | 0.52  | -0.46 | 0.46  | 0.47 | 0.22  | 0.21  | 0.30  | 0.40  |
|     | RGL   | 0.27  | -0.52 | 0.67  | 0.33  | -0.25 | 0.13  | 0.17 | 0.19  | 0.47  | 0.43  | 0.42  |

**Figure S1 (a)** Map of locations of airports in South and East Asia from the Comprehensive Observation Network for TRace gases by AIRliner (CONTRAIL) project (Machida et al., 2008). **(b)** Close-up map for airports in Japan and Republic of Korea. The whole region is divided into four subregions, namely East Asia (EAS), the Indian sub-continent (IND), Northern Southeast Asia (NSA) and Southern Southeast Asia (SSA), and all the airports and vertical profiles are grouped into the four subregions accordingly. The zoomed grid of the LMDz-INCA model is also plotted as background.

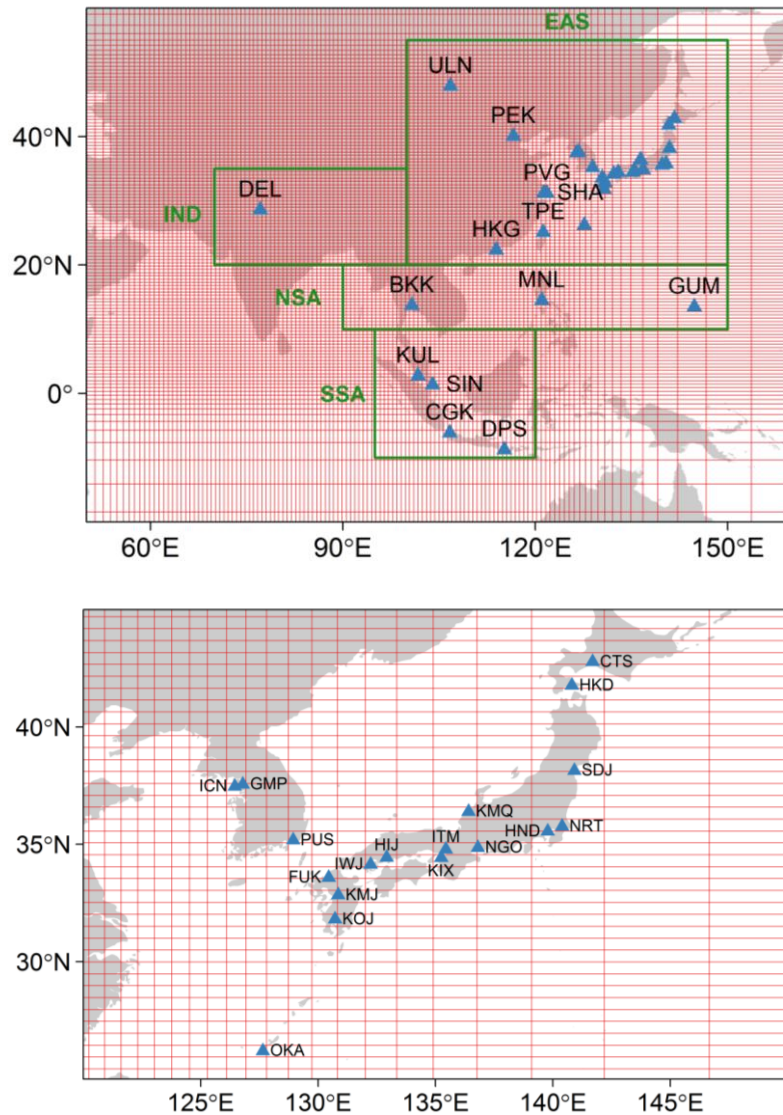

**Figure S2** Sampling dates of CO<sub>2</sub> measurements for airports in Figure S1. For each airport, only sampling dates with vertical profiles available (i.e. measurements during ascending or descending flights) are plotted.

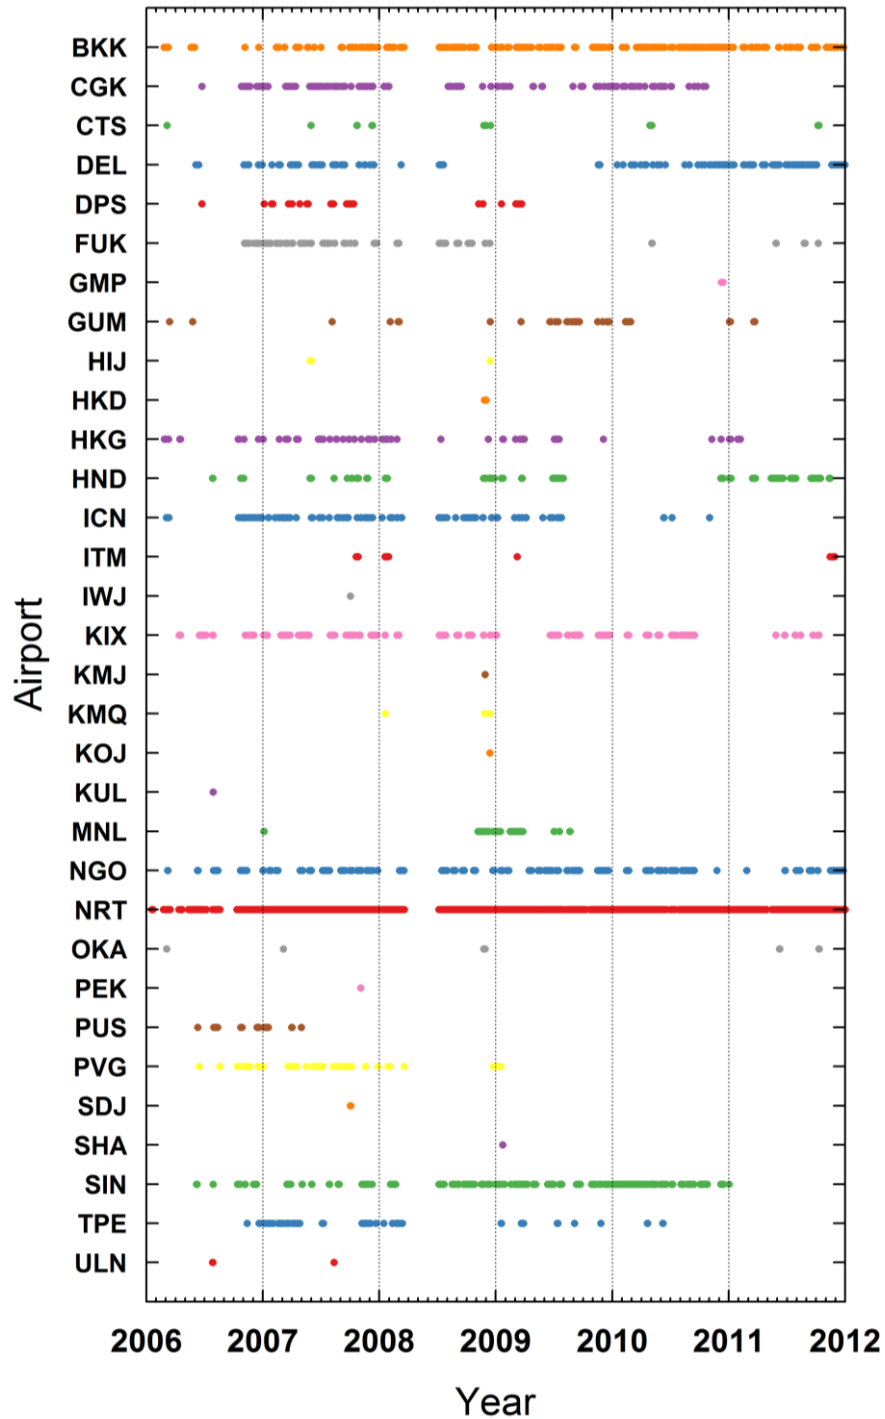

**Figure S3** Scatterplots of simulated and observed CH<sub>4</sub> mean annual gradients between HLE and other stations for April–June (a, b), July–September (c, d), October–December (e, f), and January–March (g, h). The simulated CH<sub>4</sub> gradients are based on simulations from ZASIA (a, c, e, g) and REG (b, d, f, h), respectively. In each panel, the black dotted line indicates the identity line, whereas the grey solid line indicates the linear line fitted to the data. The black and grey texts give the mean bias ( $\pm 1\sigma$ ) and RMSE of the simulated CH<sub>4</sub> mean annual gradients in reference to the observed ones.

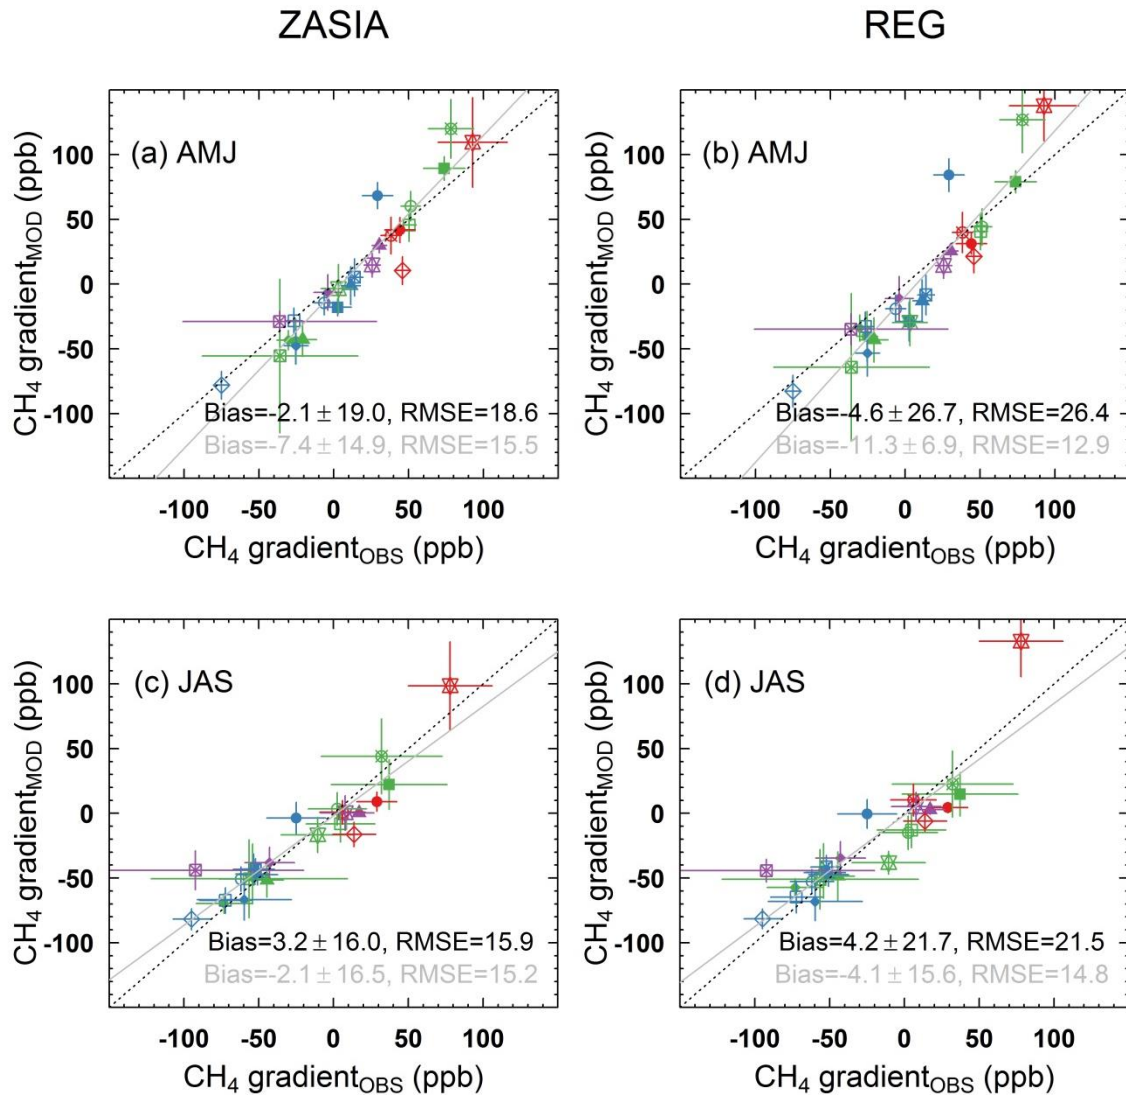

## ZASIA

## REG

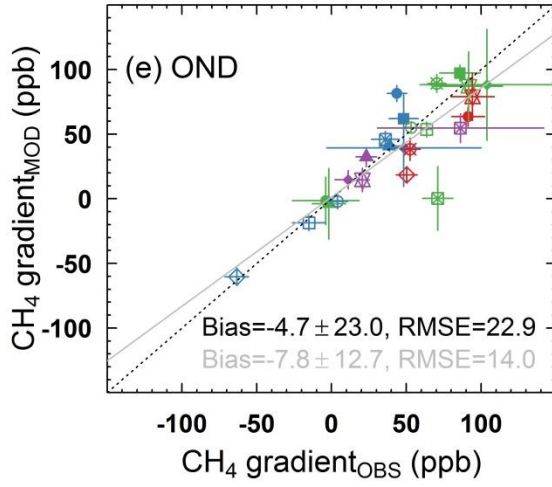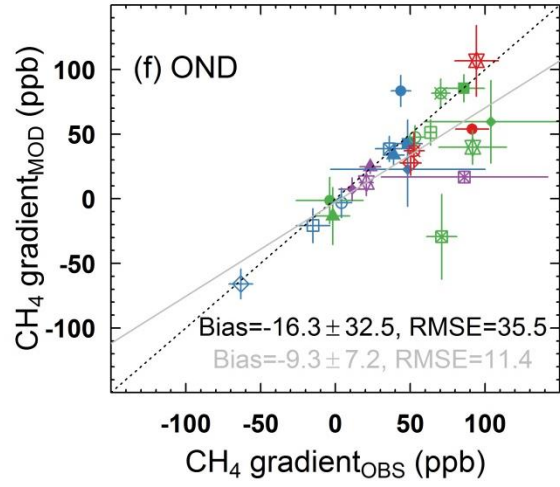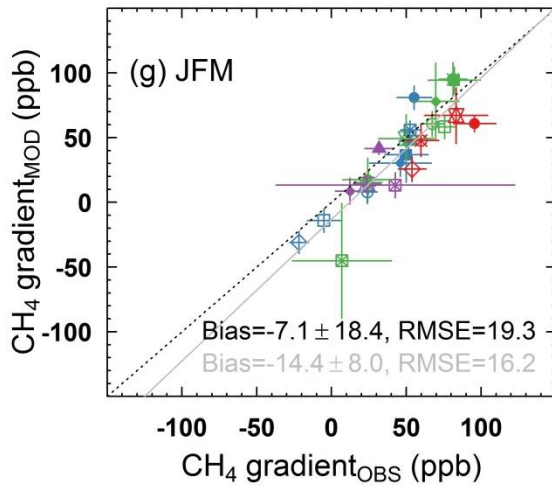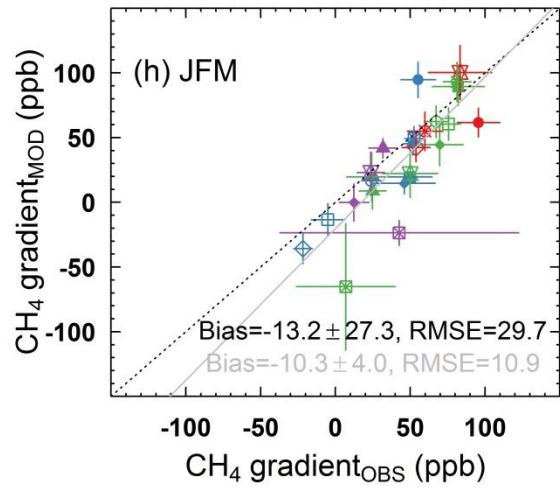

### MARINE

- DSI
- GMI
- GSN
- ▲ HAT
- MNM
- ◆ PBL
- ◇ SEY
- ⊠ YON

### COASTAL

- AMY
- BKT\_C
- ▲ BKT\_D
- COI
- ◆ CRI
- ⊠ PON\_C
- ⊠ PON\_D
- RYO
- ⊠ TAP

### MOUNTAIN

- HLE\_C
- HLE\_D
- ▲ KZM
- ◆ LLN
- ⊠ SNG
- ⊠ WLG

### CONTINENTAL

- DDR
- JIN
- KIS
- KZD
- ▲ LIN
- ◆ LON
- ⊠ MKW
- ⊠ SDZ
- ⊠ UUM
- ◇ WIS

**Figure S4** CH<sub>4</sub> surface flux maps for South and East Asia (SEA), based on two different inventories of anthropogenic emissions for the year 2008 from EDGARv4.2 and REASv2.1 (Kurokawa et al., 2013). CH<sub>4</sub> hotspots, defined as grids with 1% top emission rates, are indicated by blue dots. Both maps are generated in ZASIA grid meshes and with the same biogenic CH<sub>4</sub> fluxes as given in Table 1.

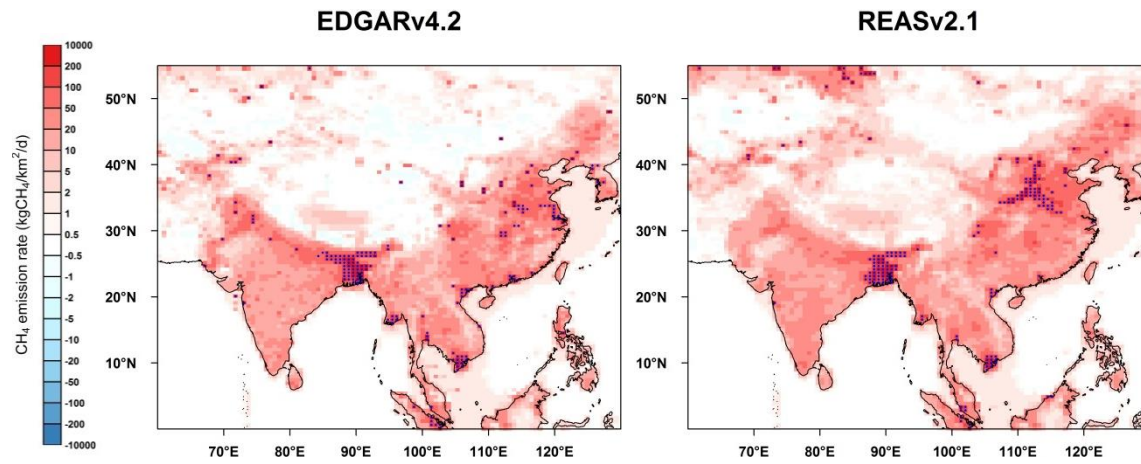



**Figure S5** Maps of CH<sub>4</sub> surface fluxes (upper panels) and CH<sub>4</sub> concentration fields at the first model level (lower panels) for the year 2010. Results from both ZASIA and REG are presented for comparison.

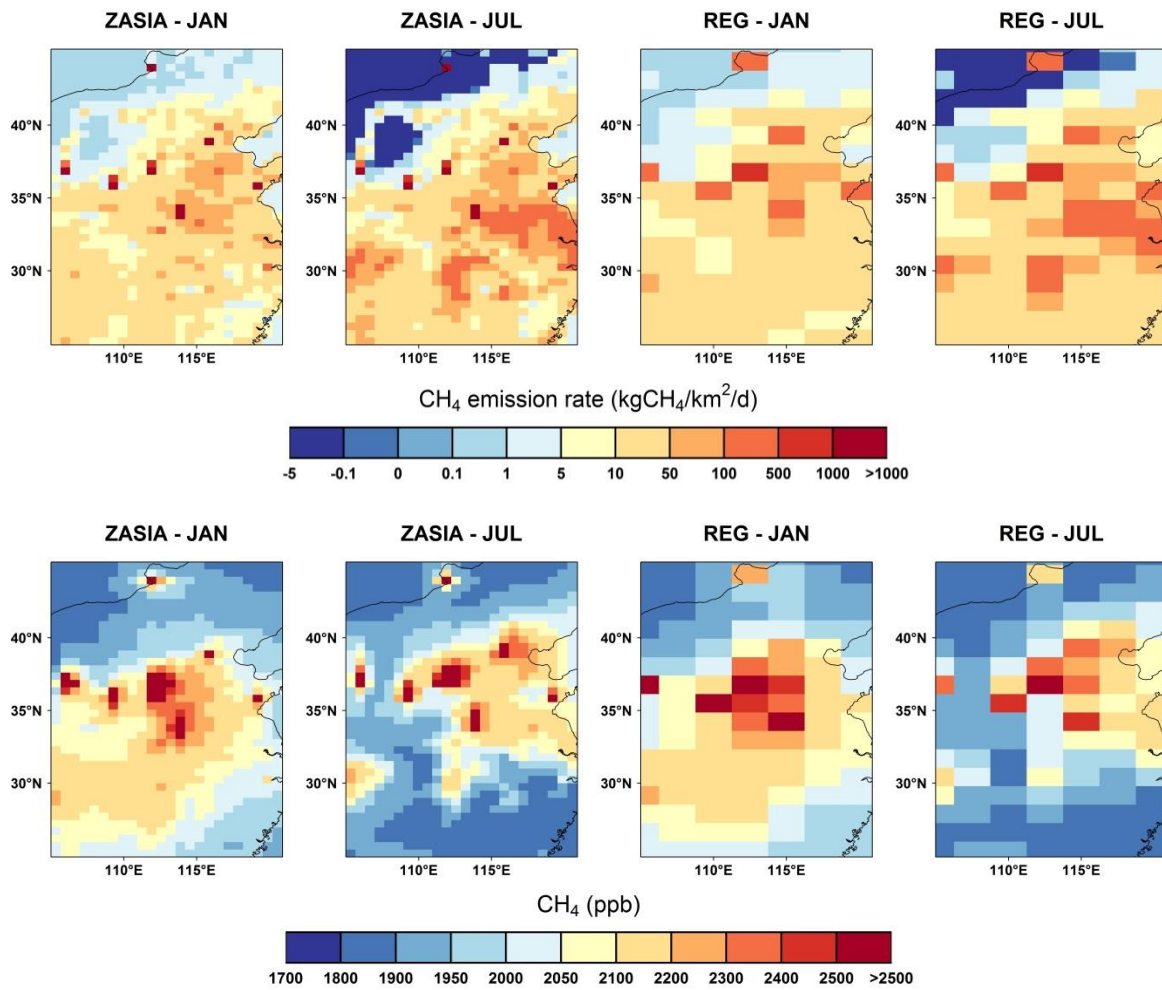

**Figure S6** Model-observation comparisons on the CH<sub>4</sub> mean annual gradients at SDZ, PON, CRI, GSN, TAP and UUM. For each station, the left panel presents the spatial distribution of mean annual CH<sub>4</sub> fluxes around the station for the year 2010 mapped with the ZASIA model grids. The black meshes indicate the REG model grids. The black dot denotes the location of the station, whereas the 3×3 meshes colored in green indicate the grid where the station is located (the ‘center grid’) and its 8 neighbors. On the right panel, the model-observation comparison on the CH<sub>4</sub> mean annual gradients is shown for each of the 9 grids. The grey shades indicate the observed CH<sub>4</sub> mean annual gradient and its uncertainty ( $\pm 1\sigma$ ). The CH<sub>4</sub> mean annual gradients simulated from ZASIA (denoted by red dots) are plotted for each grid of the 3×3 meshes from Layer 1 to Layer 7, with corresponding average layer altitudes labeled on the vertical axes. For comparison, the simulated CH<sub>4</sub> mean annual gradients from REG are also plotted (denoted by black dots) for the ‘center grid’ of the REG model grids.

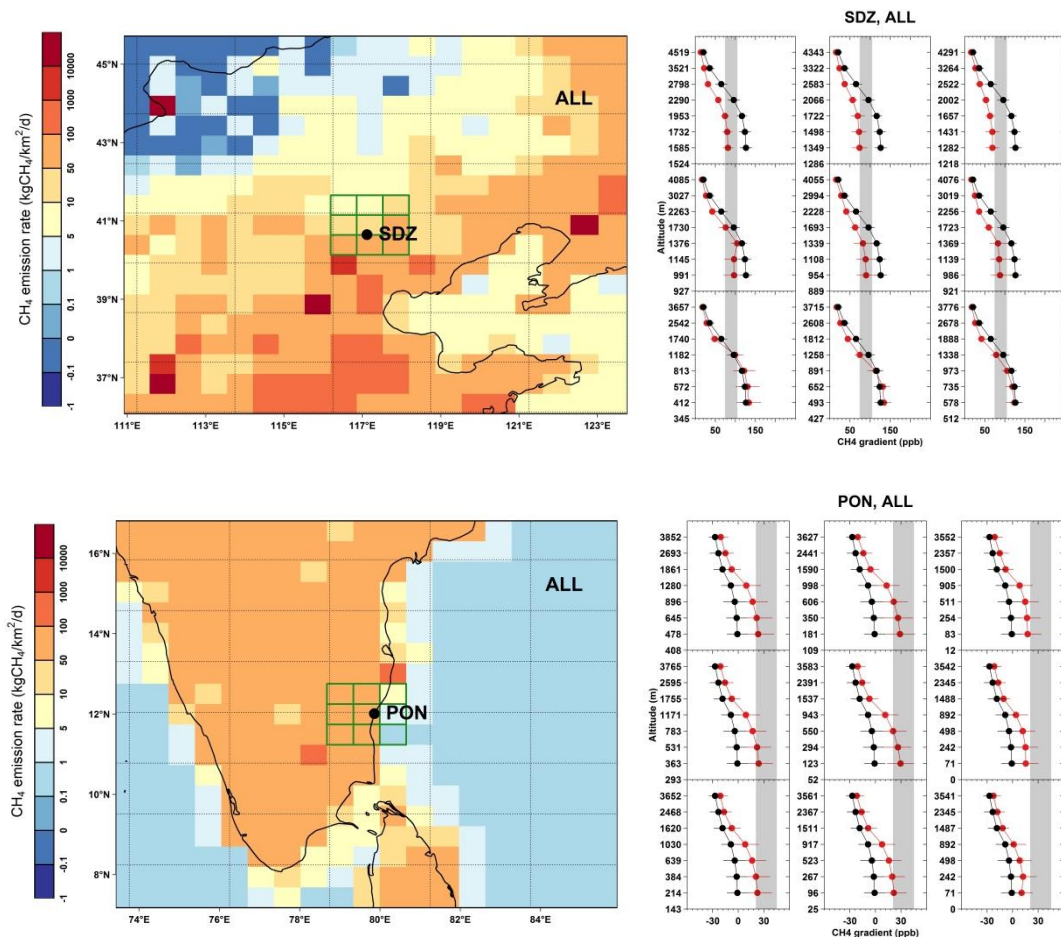

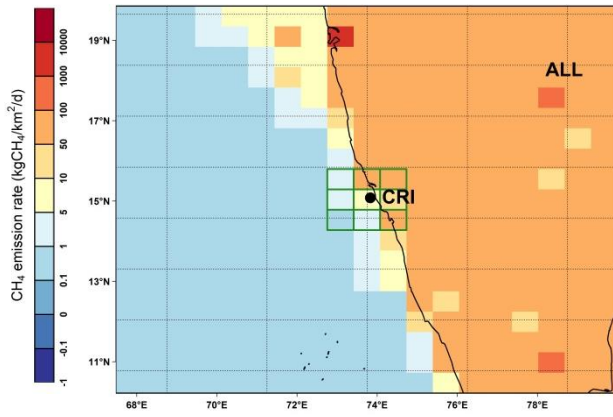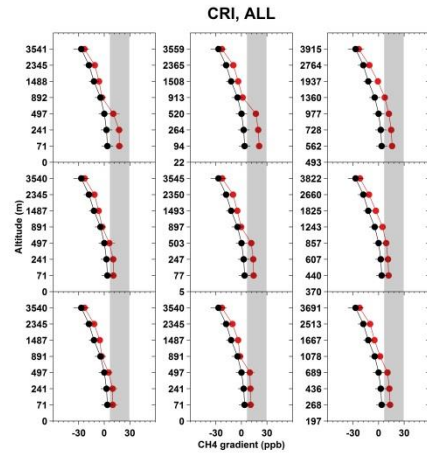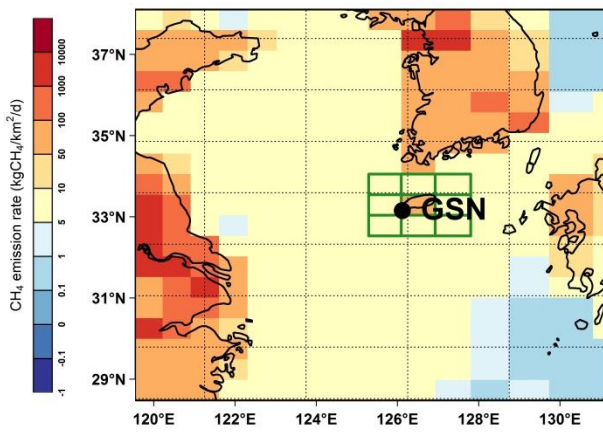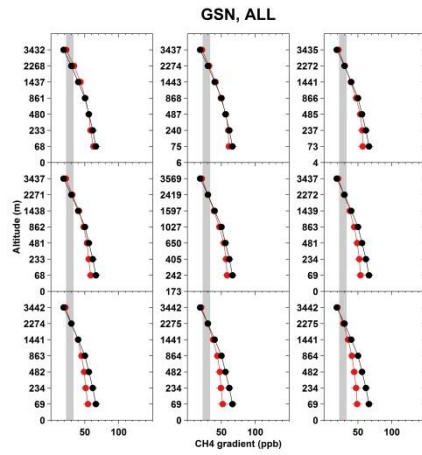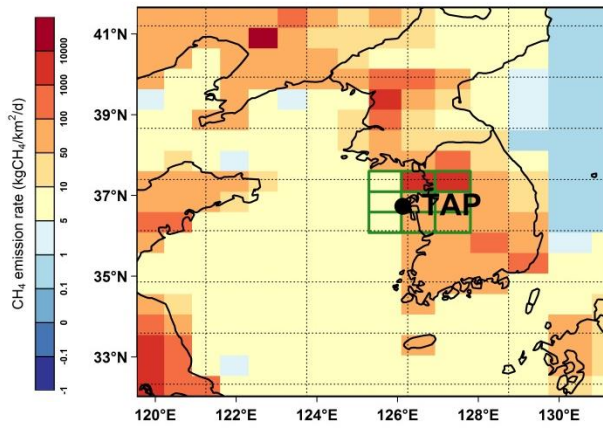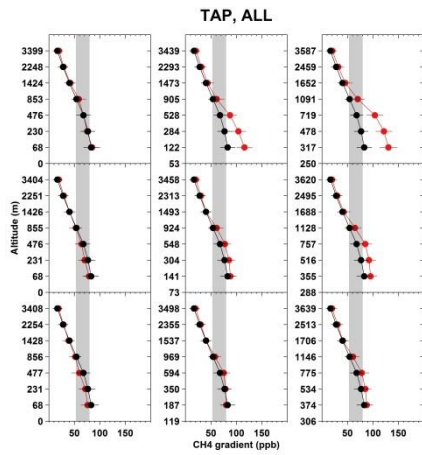

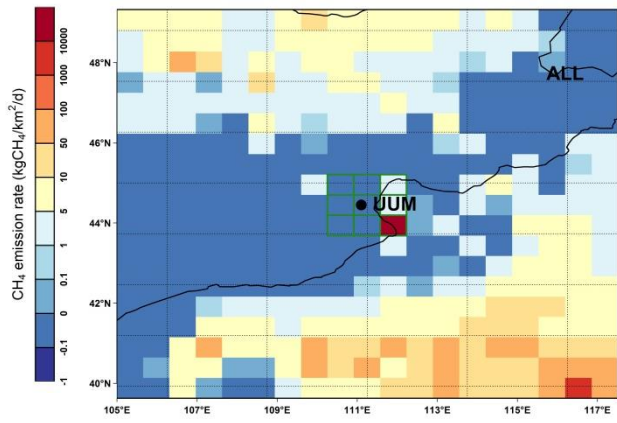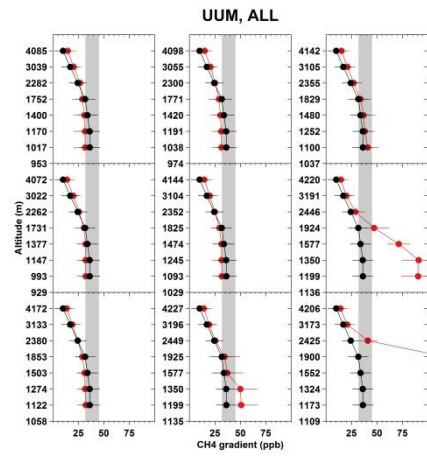

**Figure S7** Scatterplots of simulated and observed CO<sub>2</sub> mean annual gradients between HLE and other stations for April–June (a, b), July–September (c, d), October–December (e, f), and January–March (g, h). The simulated CO<sub>2</sub> gradients are based on simulations from ZASIA (a, c, e, g) and REG (b, d, f, h), respectively. In each panel, the black dotted line indicates the identity line, whereas the grey solid line indicates the linear line fitted to the data. The black and grey texts give the mean bias ( $\pm 1\sigma$ ) and RMSE of the simulated CO<sub>2</sub> mean annual gradients in reference to the observed ones.

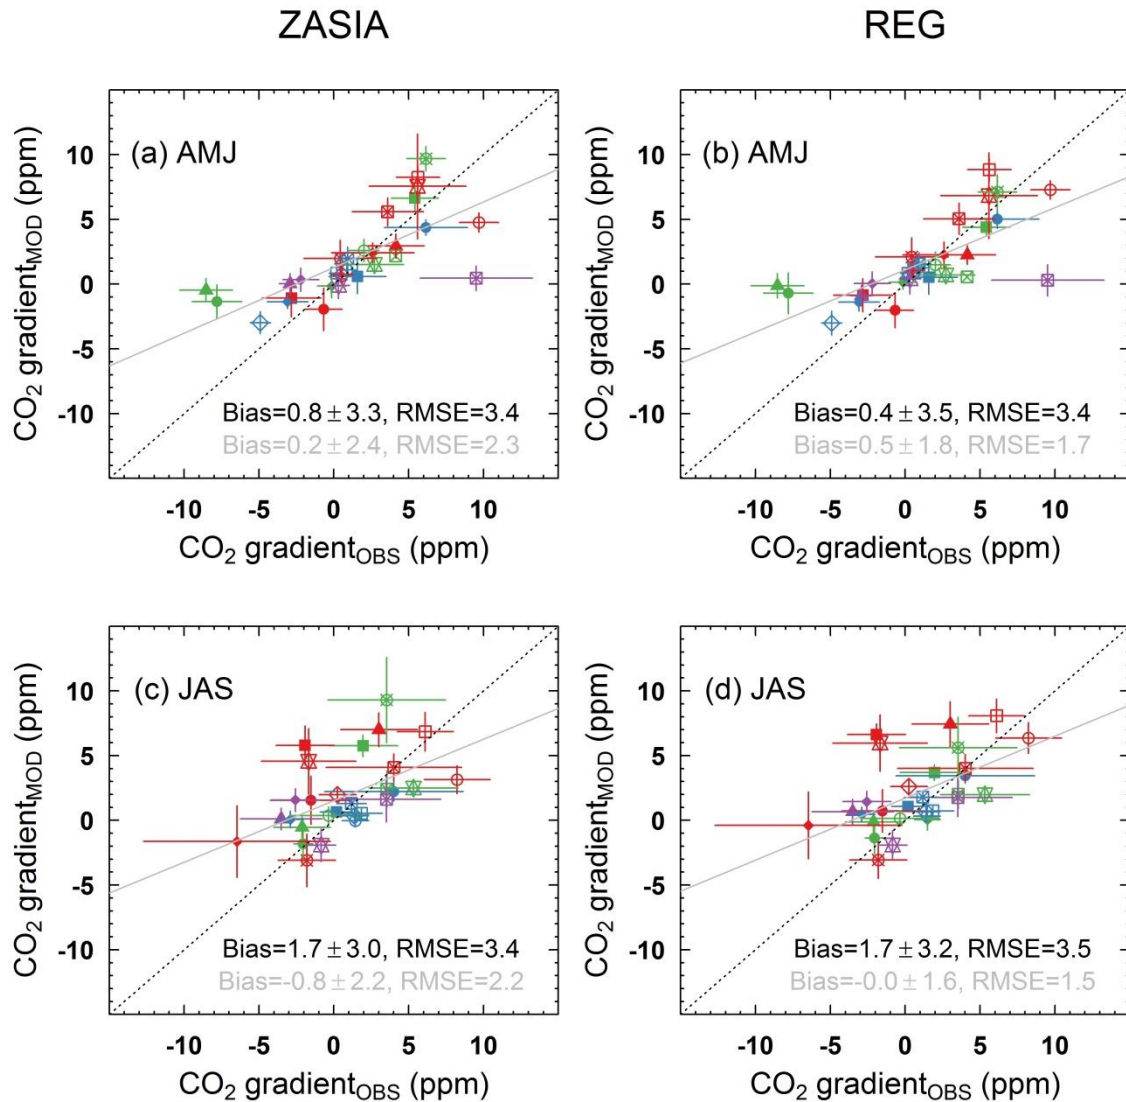



## ZASIA

## REG

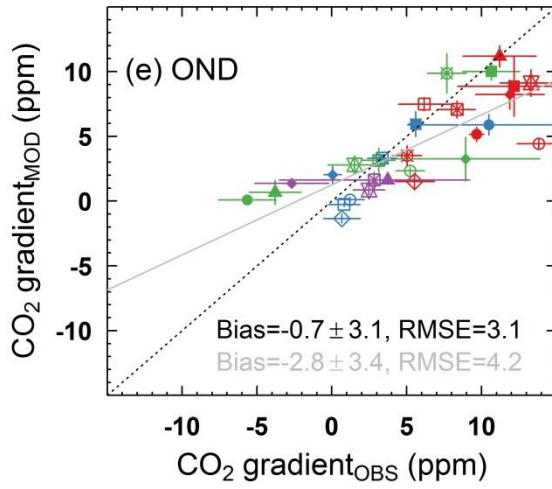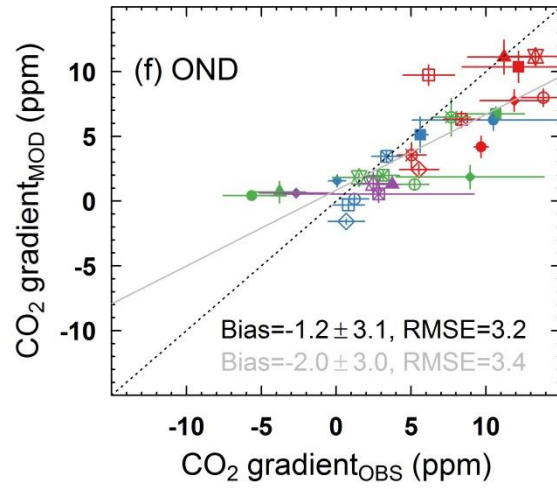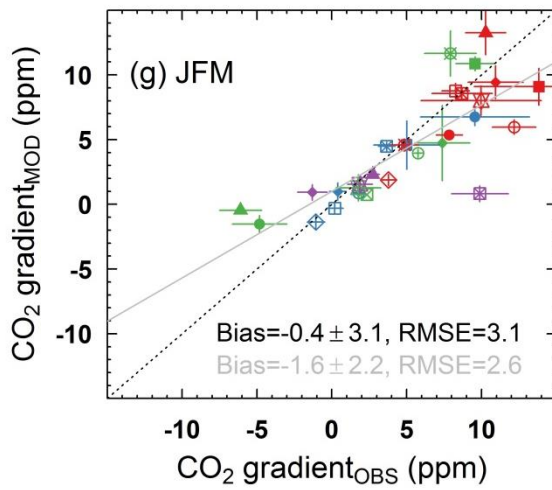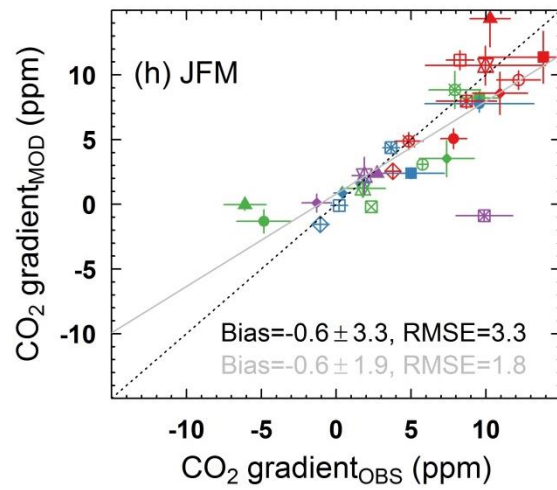

### MARINE

- DSI
- GMI
- GSN
- ▲ HAT
- MNM
- ◆ PBL
- ◇ SEY
- ⊠ YON

### COASTAL

- AMY
- BKT\_C
- ▲ BKT\_D
- COI
- ◆ CRI
- ⊠ PON\_C
- ⊠ PON\_D
- RYO
- ⊠ TAP

### MOUNTAIN

- HLE\_C
- HLE\_D
- ▲ KZM
- ◆ LLN
- ⊠ SNG
- ⊠ WLG

### CONTINENTAL

- DDR
- JIN
- KIS
- KZD
- ▲ LIN
- ◆ LON
- ⊠ MKW
- ⊠ SDZ
- ⊠ UUM
- ◇ WIS

**Figure S8** Model-observation comparisons on the CO<sub>2</sub> mean annual gradients at TAP. The left panel presents the spatial distribution of mean annual CO<sub>2</sub> fluxes around the station for the year 2010 mapped with the ZASIA model grids. The black meshes indicate the REG model grids. The black dot denotes the location of the station, whereas the 3×3 meshes colored in green indicate the grid where the station is located (the ‘center grid’) and its 8 neighbors. On the right panel, the model-observation comparison on the CO<sub>2</sub> mean annual gradients is shown for each of the 9 grids. The grey shades indicate the observed CO<sub>2</sub> mean annual gradient and its uncertainty ( $\pm 1\sigma$ ). The CO<sub>2</sub> mean annual gradients simulated from ZASIA (denoted by red dots) are plotted for each grid of the 3×3 meshes from Layer 1 to Layer 7, with corresponding average layer altitudes labeled on the vertical axes. For comparison, the simulated CO<sub>2</sub> mean annual gradients from REG are also plotted (denoted by black dots) for the ‘center grid’ of the REG model grids.

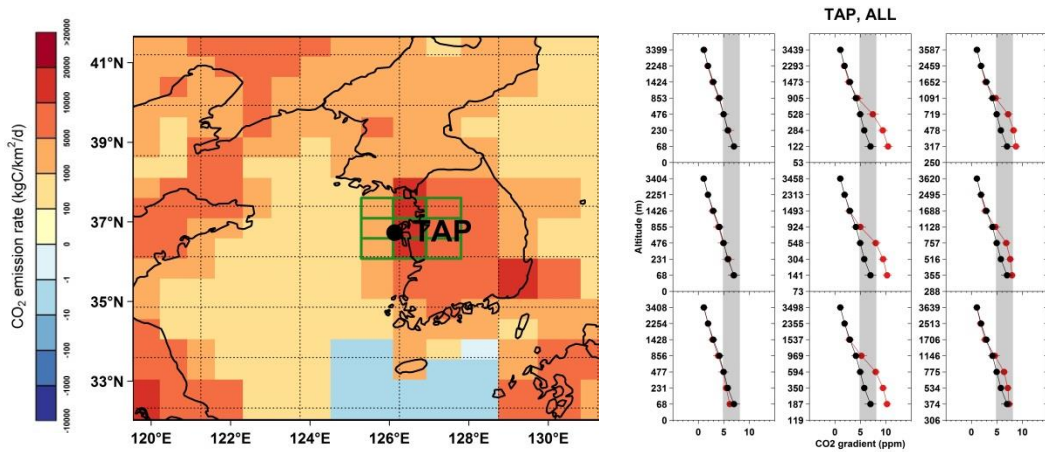

**Figure S9** Model-observation comparisons on the CH<sub>4</sub> seasonal cycles at HLE, WLG, KZM, SDZ, TAP, GSN, BKT, SNG and CRI. For each station, the left panel presents the spatial distribution of mean annual CH<sub>4</sub> fluxes around the station for the year 2010 mapped with the ZASIA model grids. The black meshes indicate the REG model grids. The black dot denotes the location of the station, whereas the 3×3 meshes colored in green indicate the grid where the station is located (the ‘center grid’) and its 8 neighbors. On the right panel, the model-observation comparison on the CH<sub>4</sub> mean seasonal cycles is shown for each of the 9 grids. The grey shades indicate the observed CH<sub>4</sub> mean seasonal cycle and its uncertainty ( $\pm 1\sigma$ ) calculated from 1000 bootstrap replicates. The CH<sub>4</sub> mean seasonal cycles simulated from ZASIA (denoted by colored solid lines) are plotted for each grid of the 3×3 meshes and for different layers. For comparison, the simulated CH<sub>4</sub> mean seasonal cycles from REG are also plotted (denoted by colored dotted lines) for the ‘center grid’ of the REG model grids.

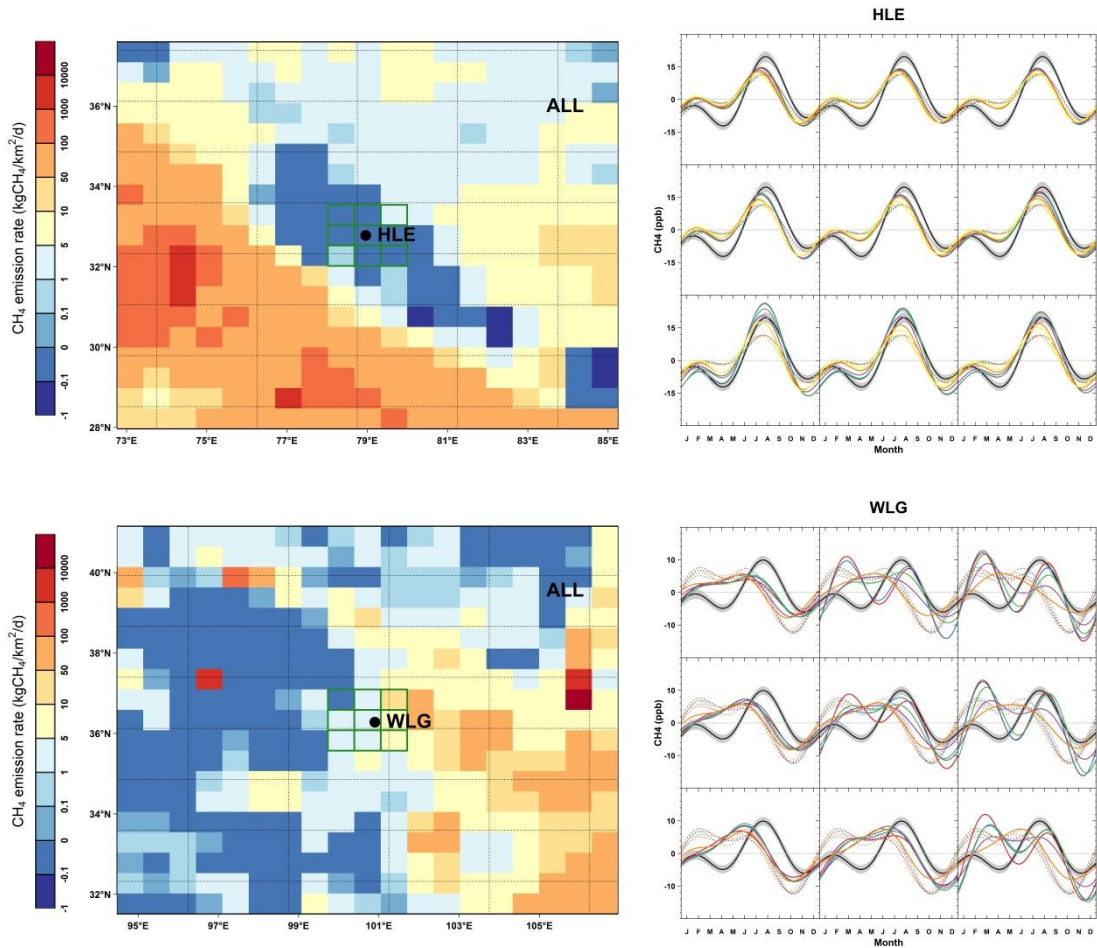



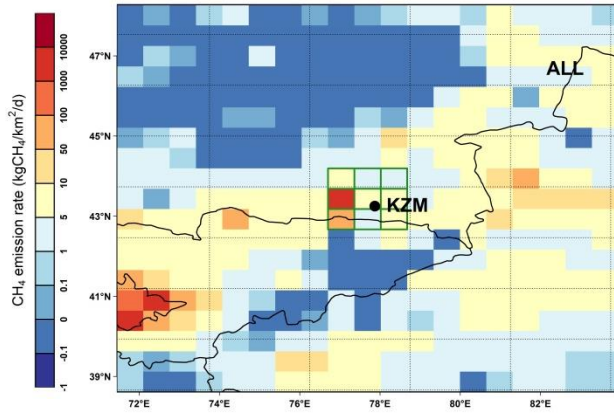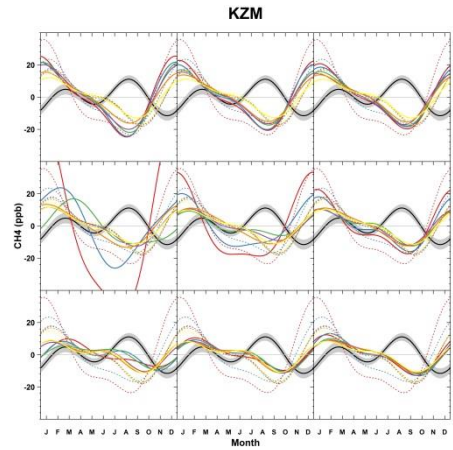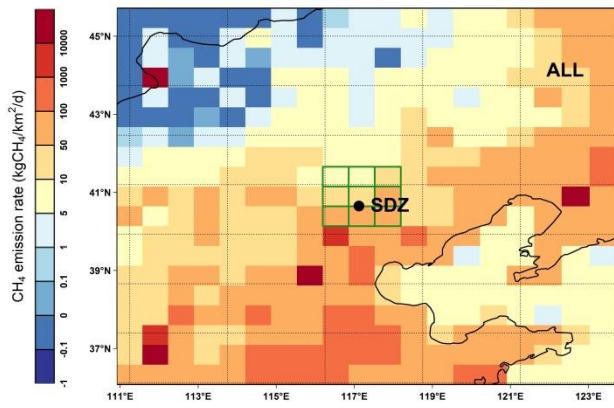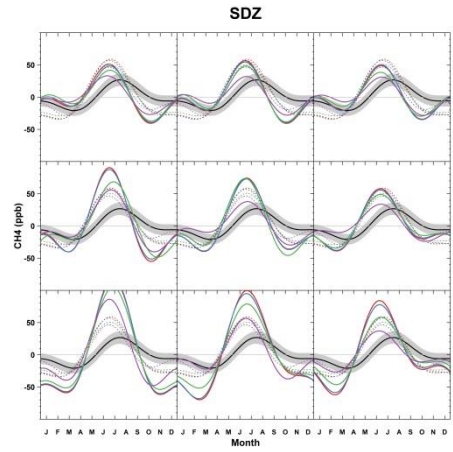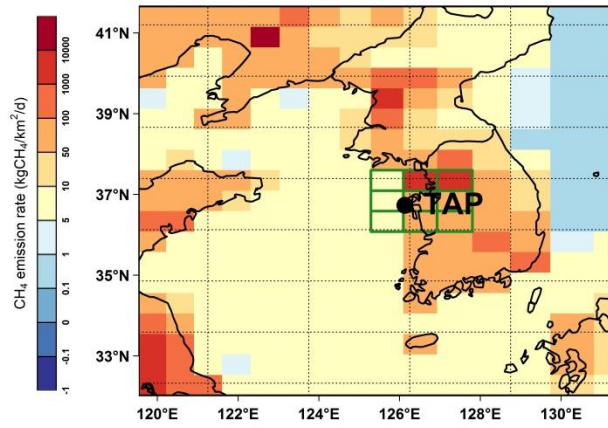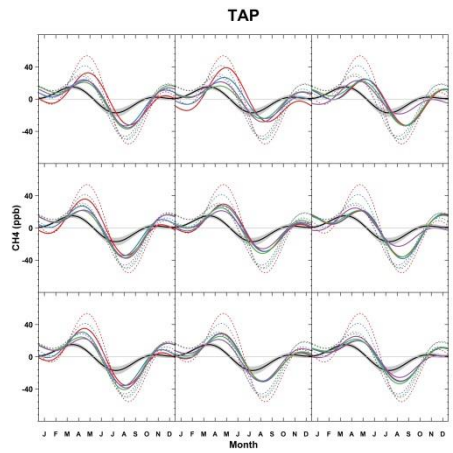

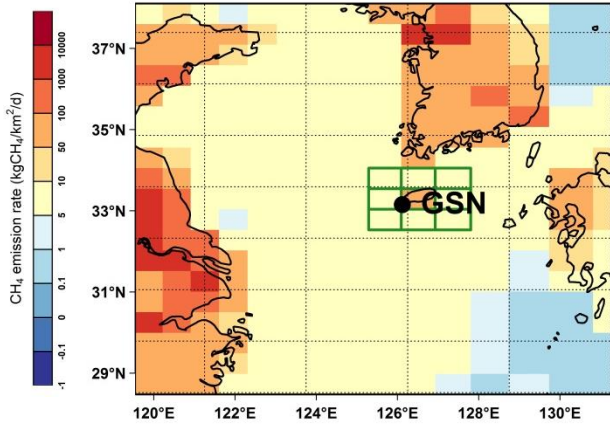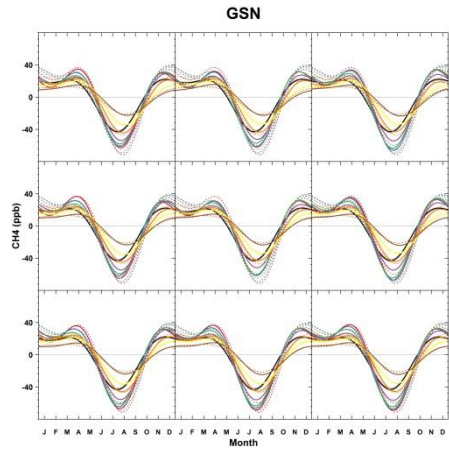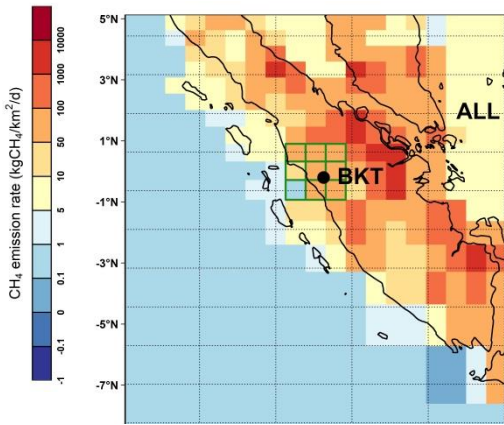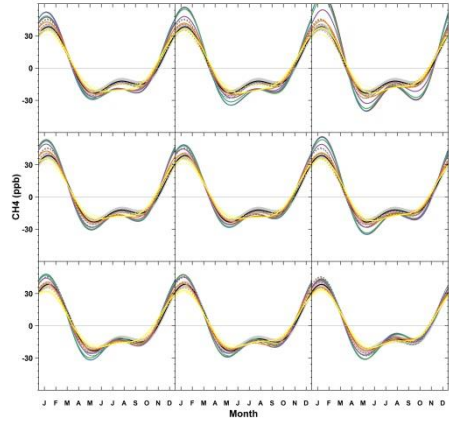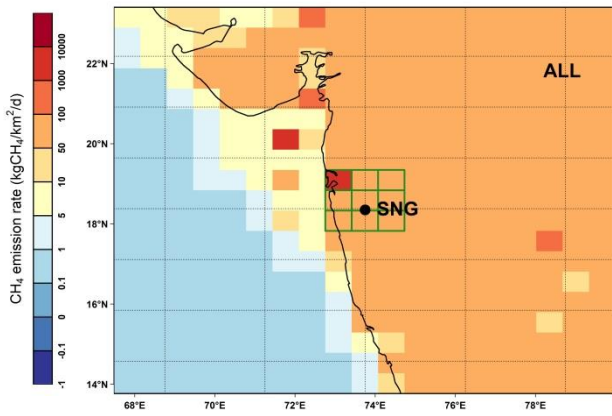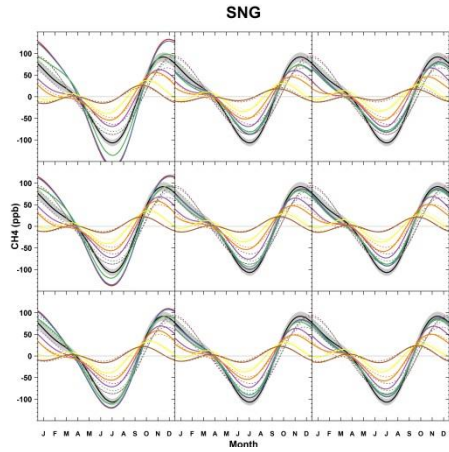

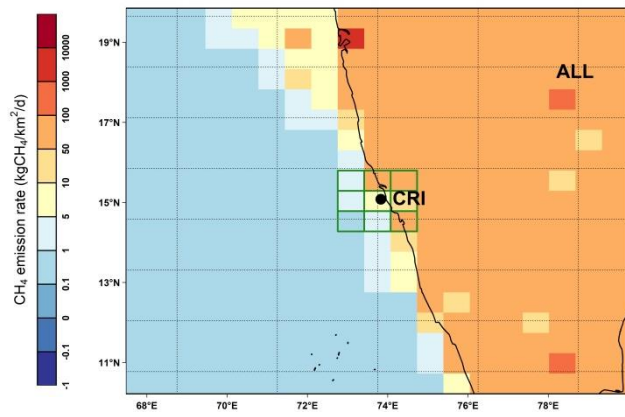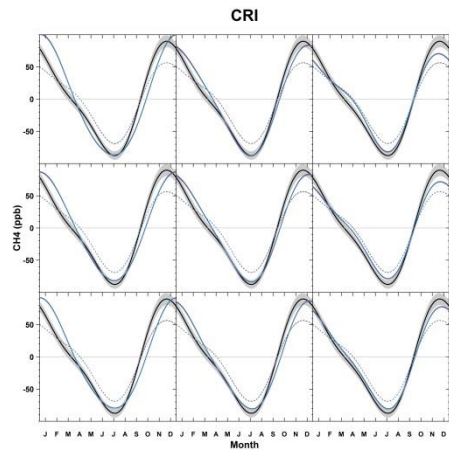

- LEV 1
- LEV 2
- LEV 3
- LEV 4
- LEV 5
- LEV 6
- LEV 7
- LEV 8
- LEV 9

**Figure S10** Model-observation comparisons on the CO<sub>2</sub> seasonal cycles at HLE, SNG, CRI, GSN and KIS. For each station, the left panel presents the spatial distribution of mean annual CO<sub>2</sub> fluxes around the station for the year 2010 mapped with the ZASIA model grids. The black meshes indicate the REG model grids. The black dot denotes the location of the station, whereas the 3×3 meshes colored in green indicate the grid where the station is located (the ‘center grid’) and its 8 neighbors. On the right panel, the model-observation comparison on the CO<sub>2</sub> mean seasonal cycles is shown for each of the 9 grids. The grey shades indicate the observed CO<sub>2</sub> mean seasonal cycle and its uncertainty ( $\pm 1\sigma$ ) calculated from 1000 bootstrap replicates. The CO<sub>2</sub> mean seasonal cycles simulated from ZASIA (denoted by colored solid lines) are plotted for each grid of the 3×3 meshes and for different layers. For comparison, the simulated CO<sub>2</sub> mean seasonal cycles from REG are also plotted (denoted by colored dotted lines) for the ‘center grid’ of the REG model grids.

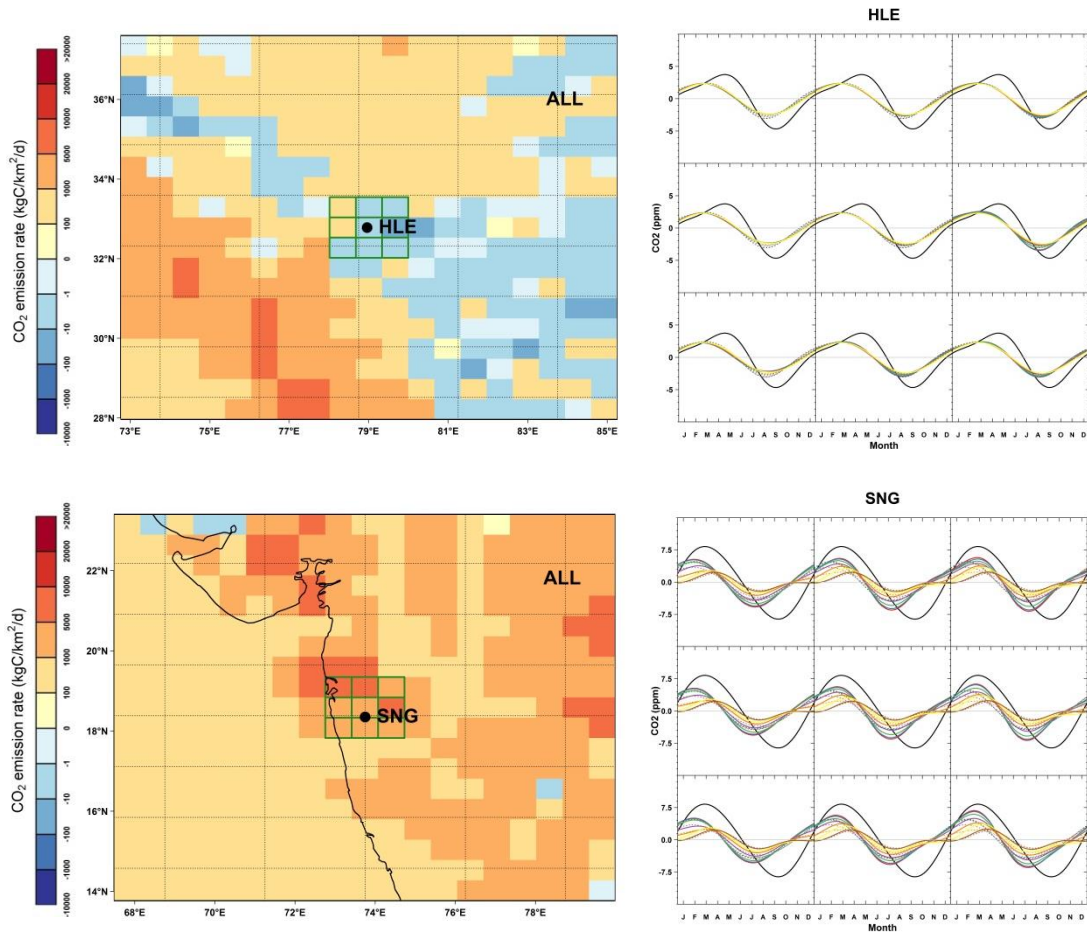



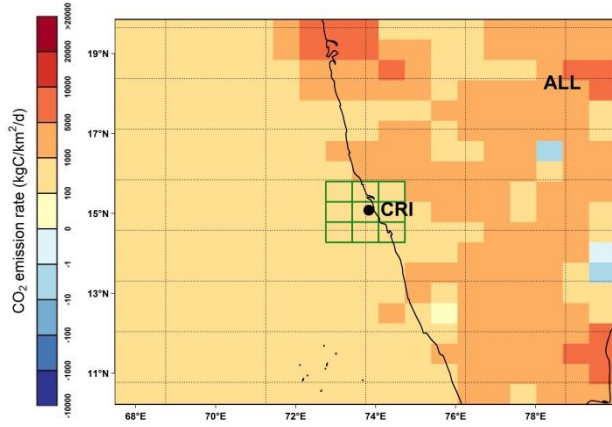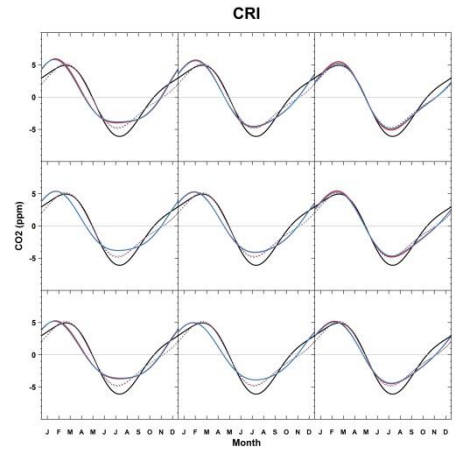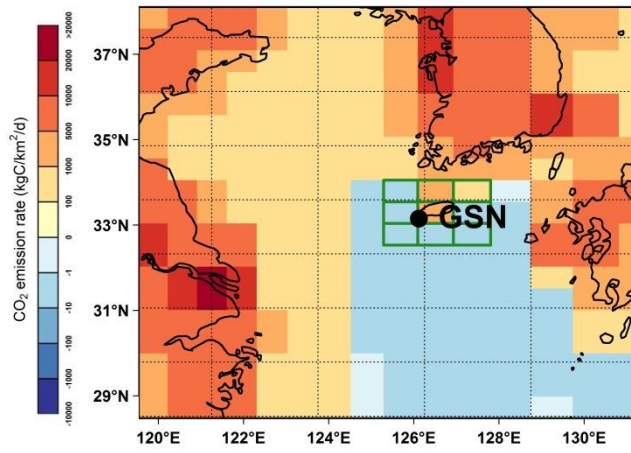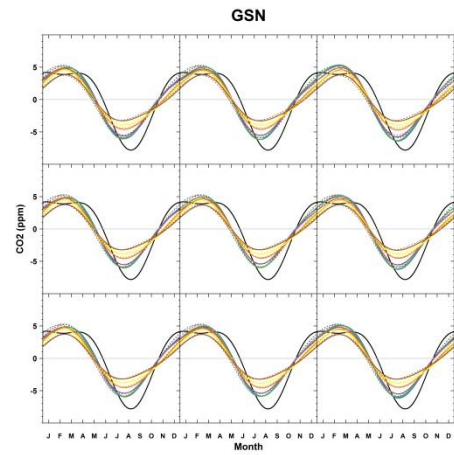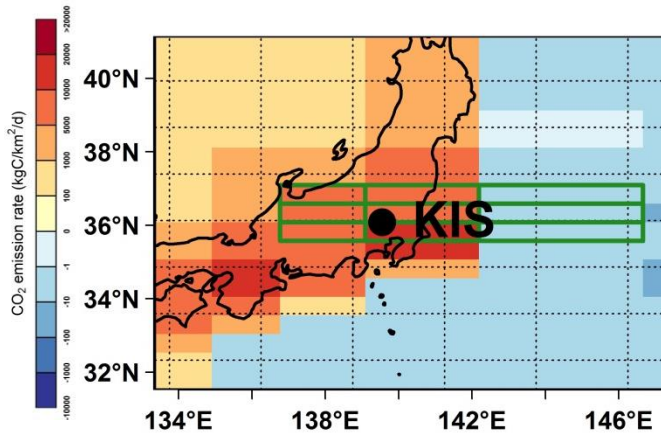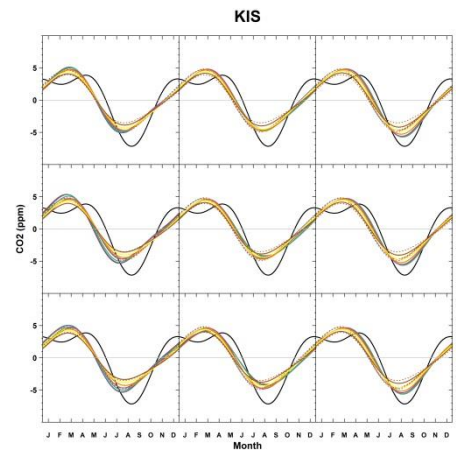

- LEV 1
- LEV 2
- LEV 3
- LEV 4
- LEV 5
- LEV 6
- LEV 7
- LEV 8
- LEV 9

**Figure S11** Taylor diagrams showing correlations and normalized standard deviations (NSD; the ratio of the simulated to observed standard deviation) between the simulated and observed CH<sub>4</sub> synoptic variability for (a,b) April–June (AMJ), (c,d) July–September (JAS), (e,f) October–December (OND) and (g,h) January–March (JFM). Results from both ZASIA (a,c,e,g) and REG (b,d,f,h) are presented. For each station, the CH<sub>4</sub> synoptic variability is calculated from residuals from the smoothed fitting curve.

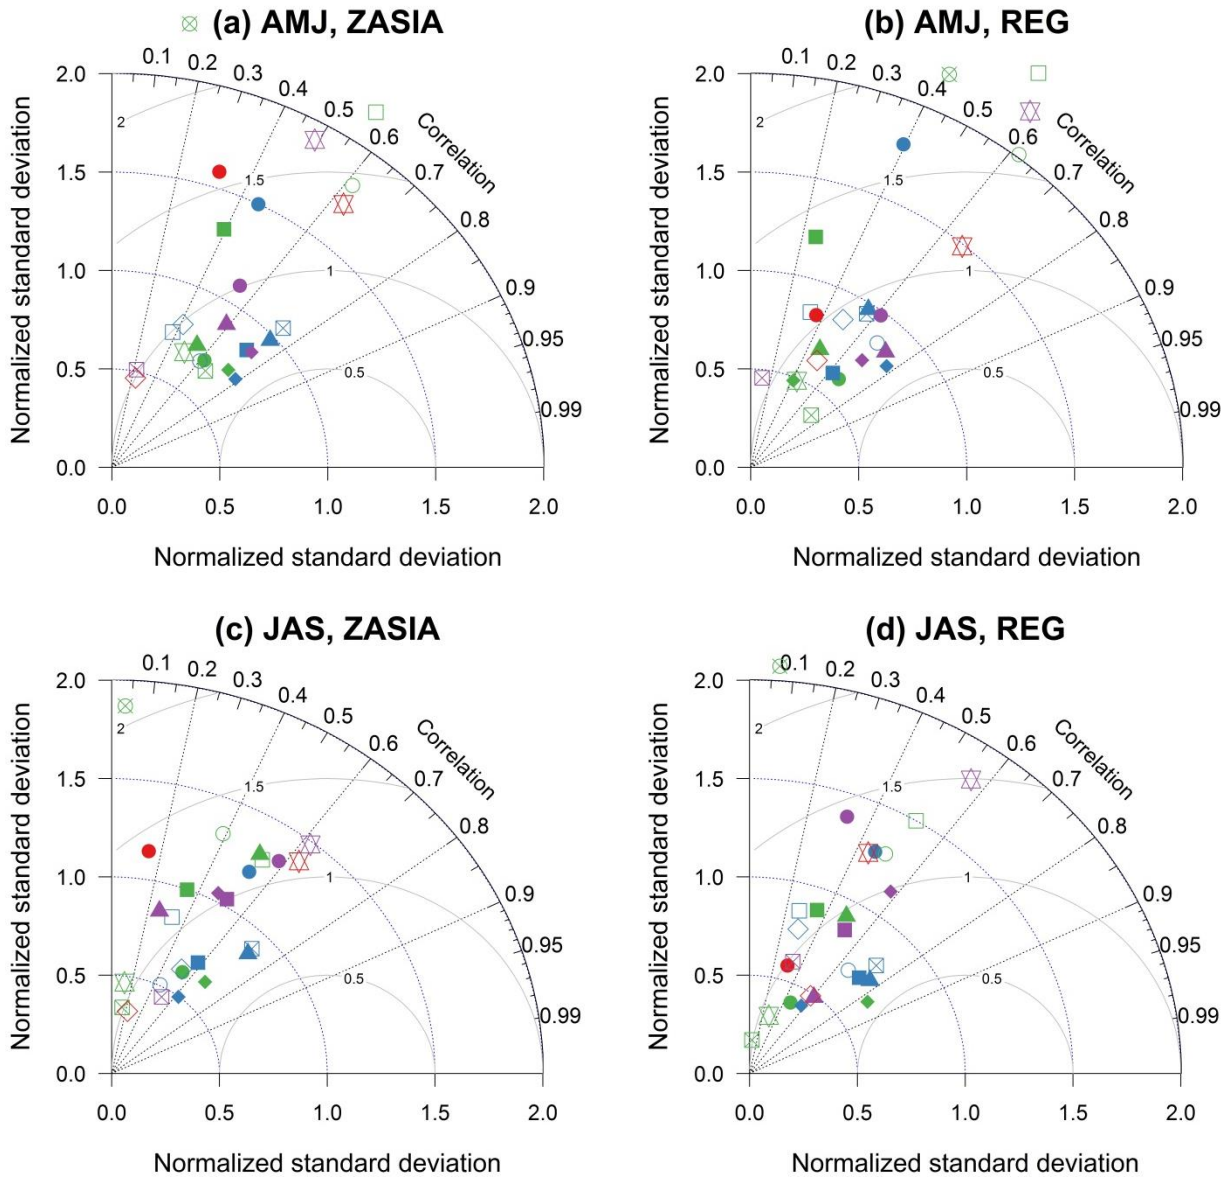

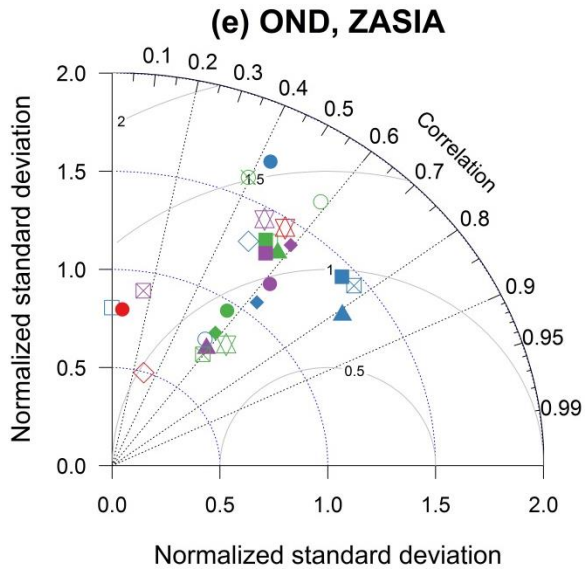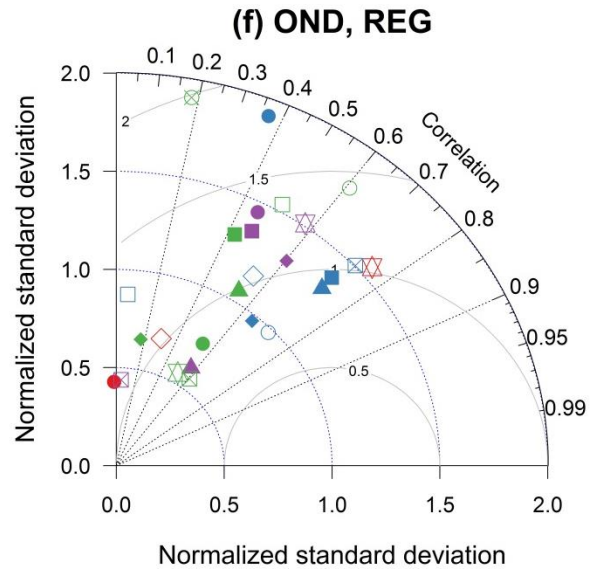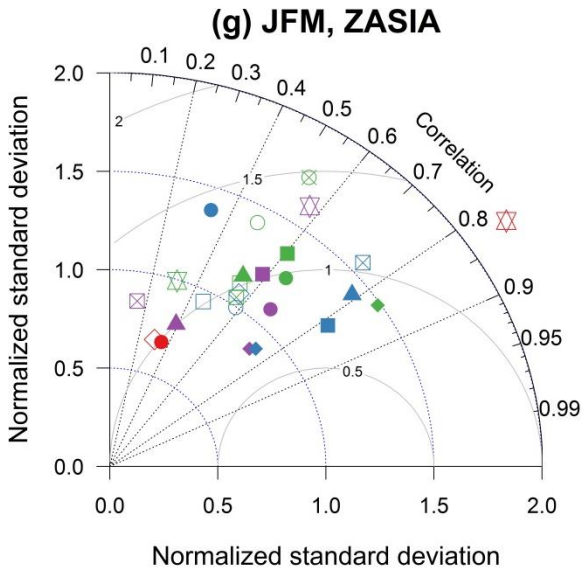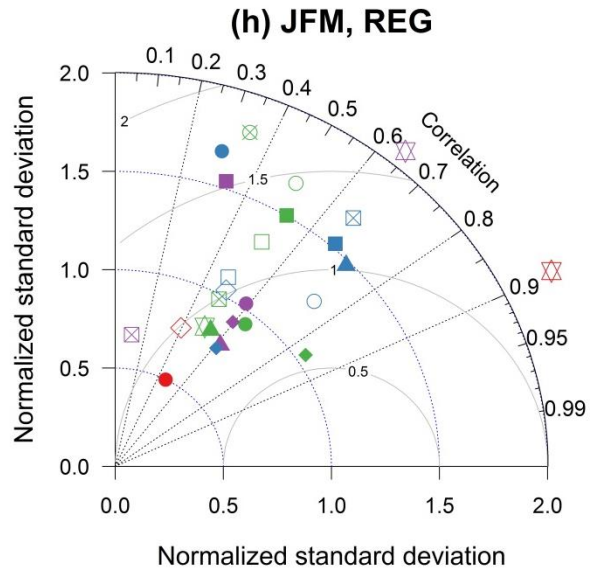

- MARINE**
- DSI
  - GMI
  - GSN
  - ▲ HAT
  - MNM
  - ◆ PBL
  - ◇ SEY
  - ⊠ YON

- COASTAL**
- AMY
  - BKT\_C
  - ▲ BKT\_D
  - COI
  - ◆ CRI
  - ⊠ PON\_C
  - ⊠ PON\_D
  - RYO
  - ⊠ TAP

- MOUNTAIN**
- HLE\_C
  - HLE\_D
  - ▲ KZM
  - ◆ LLN
  - ⊠ SNG
  - ⊠ WLG

- CONTINENTAL**
- DDR
  - JIN
  - KIS
  - KZD
  - ▲ LIN
  - ◆ LON
  - ⊠ MKW
  - ⊠ SDZ
  - ⊠ UUM
  - ◇ WIS

**Figure S12** The CH<sub>4</sub> synoptic variability at CRI, SNG and SDZ simulated from ZASIA (red dots) and REG (blue dots), in comparison with the observed CH<sub>4</sub> synoptic variability (black dots). For each station, synoptic variability is calculated as residuals from the smoothed fitting curve. The open circles indicate the synoptic events that are not realistically simulated by ZASIA, with a model-observation deviation (absolute value) beyond four times the average.

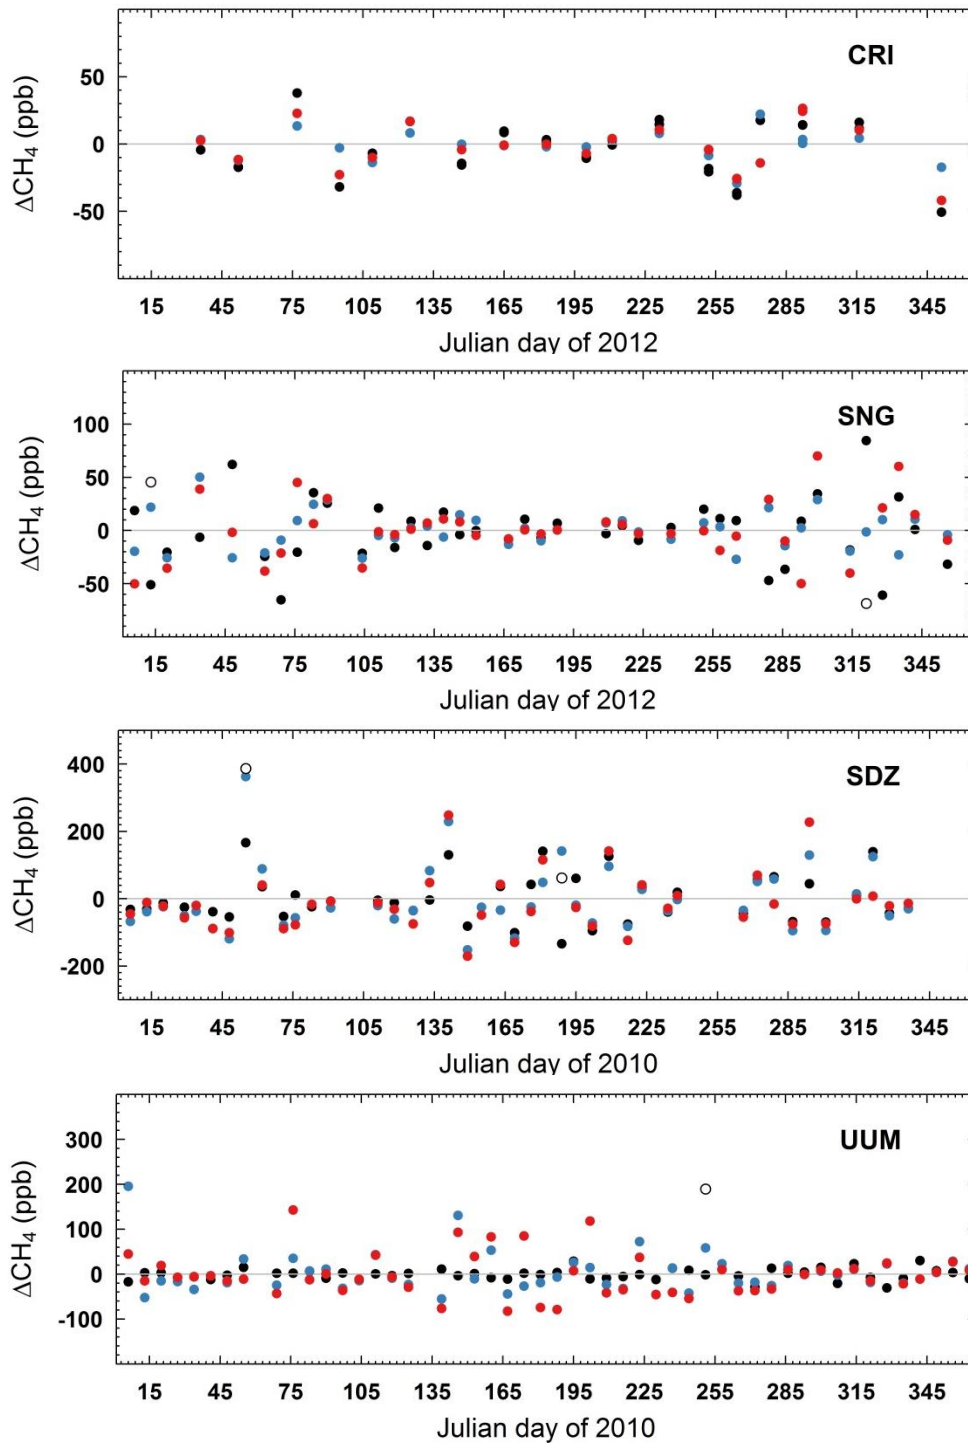



**Figure S13** Taylor diagrams showing correlations and normalized standard deviations (NSD; the ratio of the simulated to observed standard deviation) between the simulated and observed CO<sub>2</sub> synoptic variability for (a,b) April–June (AMJ), (c,d) July–September (JAS), (e,f) October–December (OND) and (g,h) January–March (JFM). Results from both ZASIA (a,c,e,g) and REG (b,d,f,h) are presented. For each station, the CO<sub>2</sub> synoptic variability is calculated from residuals from the smoothed fitting curve.

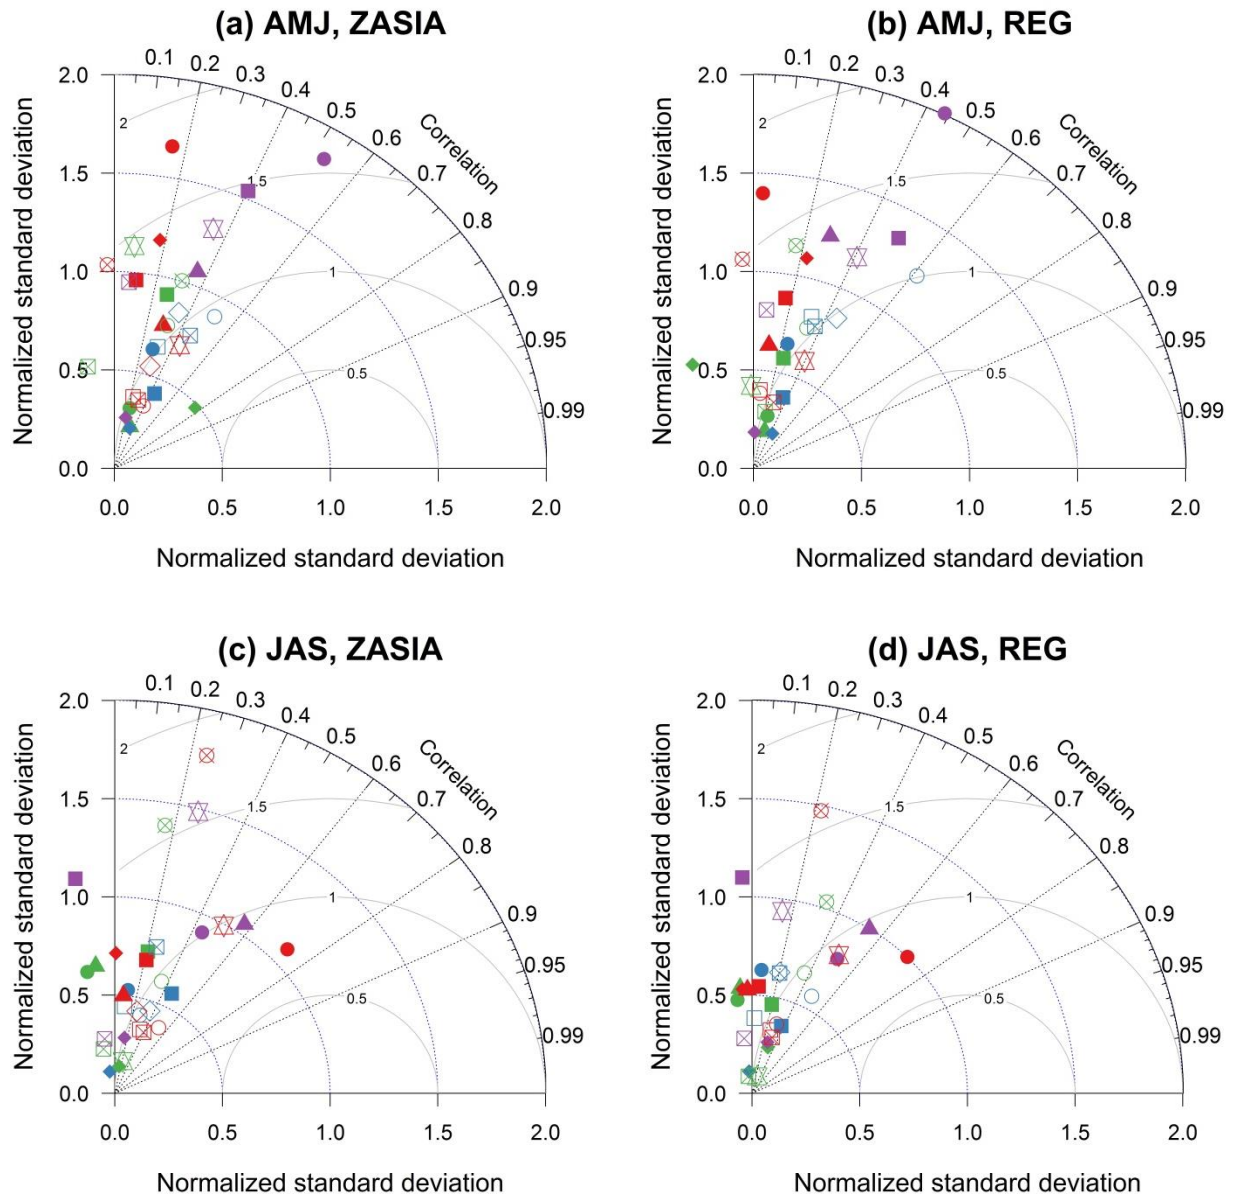

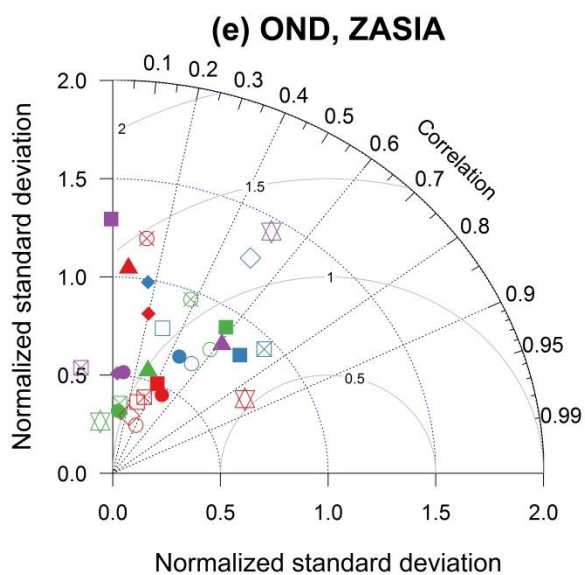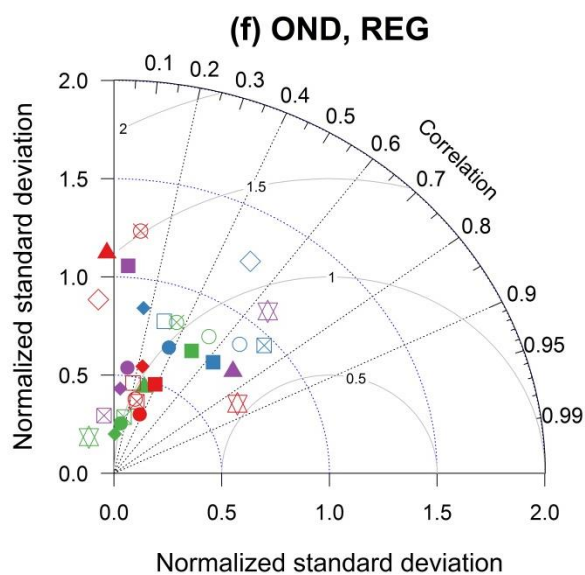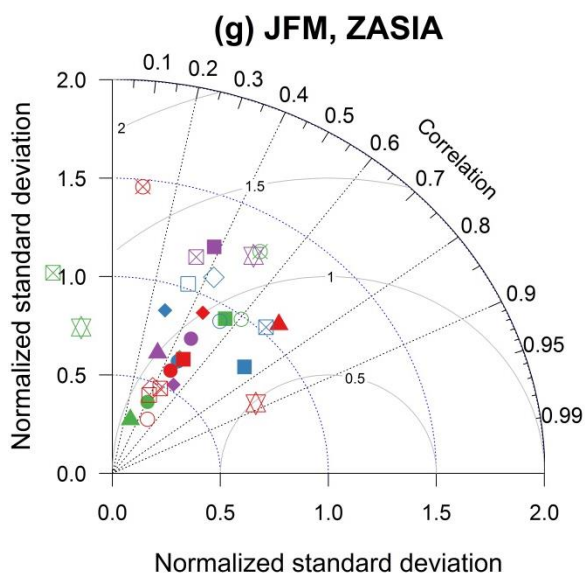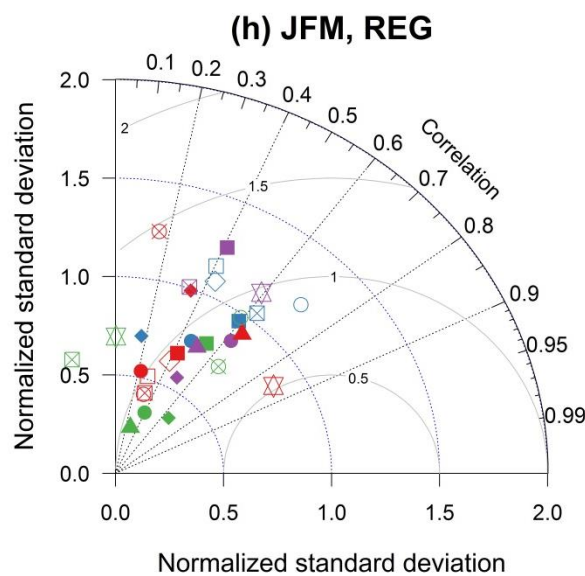

- | MARINE | COASTAL | MOUNTAIN | CONTINENTAL |
|--------|---------|----------|-------------|
| ■ DSI  | ■ AMY   | ■ HLE_C  | □ DDR       |
| □ GMI  | ● BKT_C | ● HLE_D  | ■ JIN       |
| ● GSN  | ▲ BKT_D | ▲ KZM    | ○ KIS       |
| ▲ HAT  | □ COI   | ◆ LLN    | ● KZD       |
| ○ MNM  | ◆ CRI   | ⊠ SNG    | ▲ LIN       |
| ◆ PBL  | ⊠ PON_C | ⊠ WLG    | ◆ LON       |
| ◇ SEY  | ⊠ PON_D |          | ⊠ MKW       |
| ⊠ YON  | ○ RYO   |          | ⊠ SDZ       |
|        | ⊠ TAP   |          | ⊠ UUM       |
|        |         |          | ◇ WIS       |

**Figure S14** The CH<sub>4</sub> and CO<sub>2</sub> synoptic variability at BKT ('C' for continuous measurements) and PON ('D' for discrete flask measurements) simulated from ZASIA (red dots) and REG (blue dots), in comparison with the observed CO<sub>2</sub> synoptic variability (black dots). For each station, synoptic variability is calculated as residuals from the smoothed fitting curve, and here for BKT and PON we extract and plot time series of the residuals for the year 2012 and 2009, respectively. The open circles indicate the synoptic events that are not realistically simulated by ZASIA, with a model-observation deviation (absolute value) beyond four times the average. Note the different model performance on CH<sub>4</sub> and CO<sub>2</sub> at the same station during the same period.

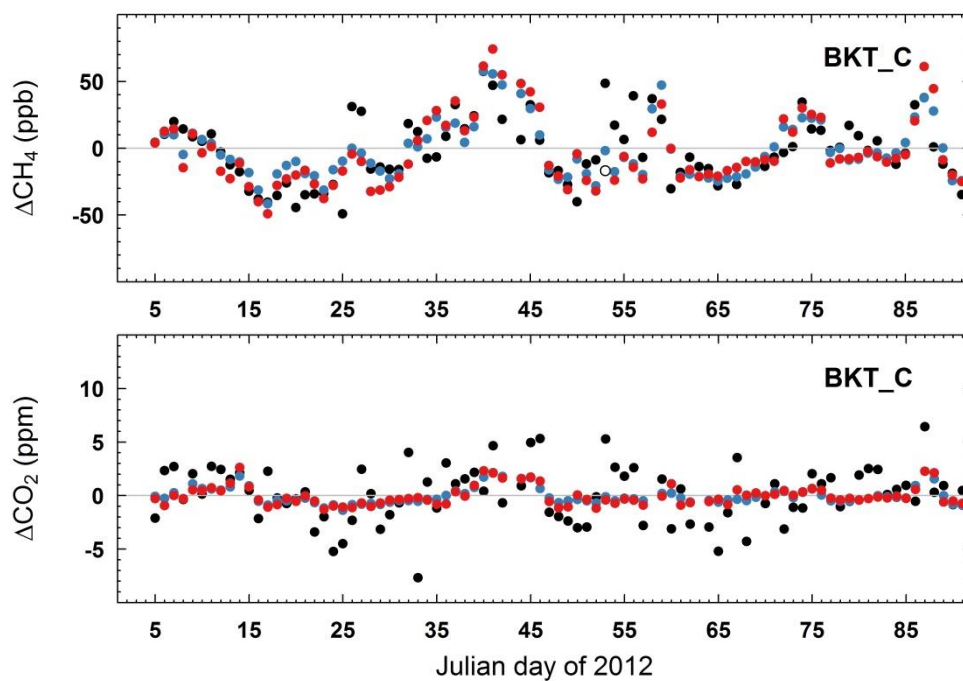

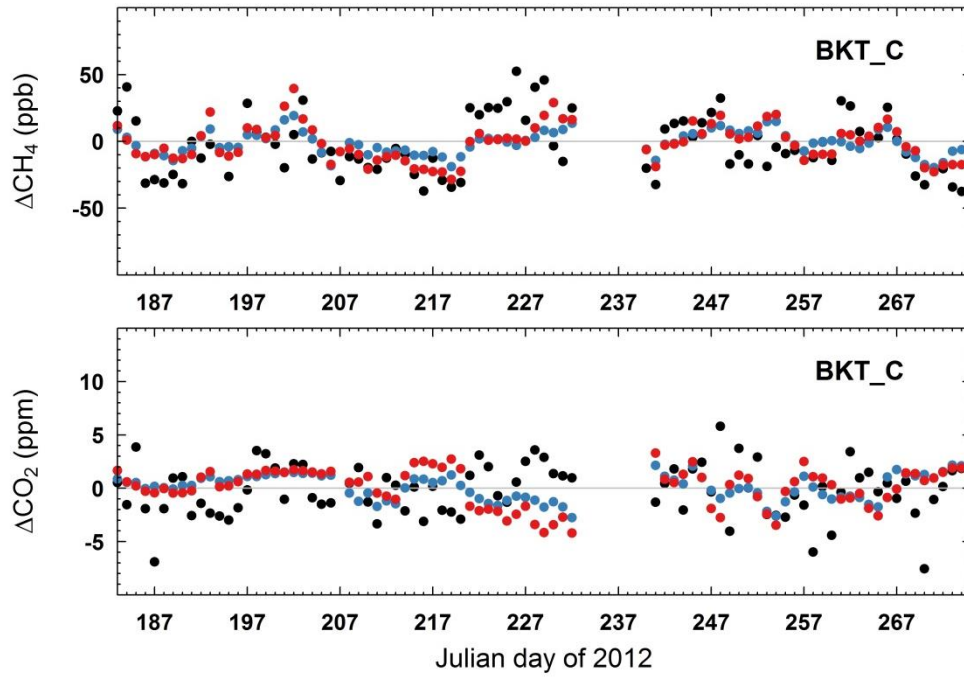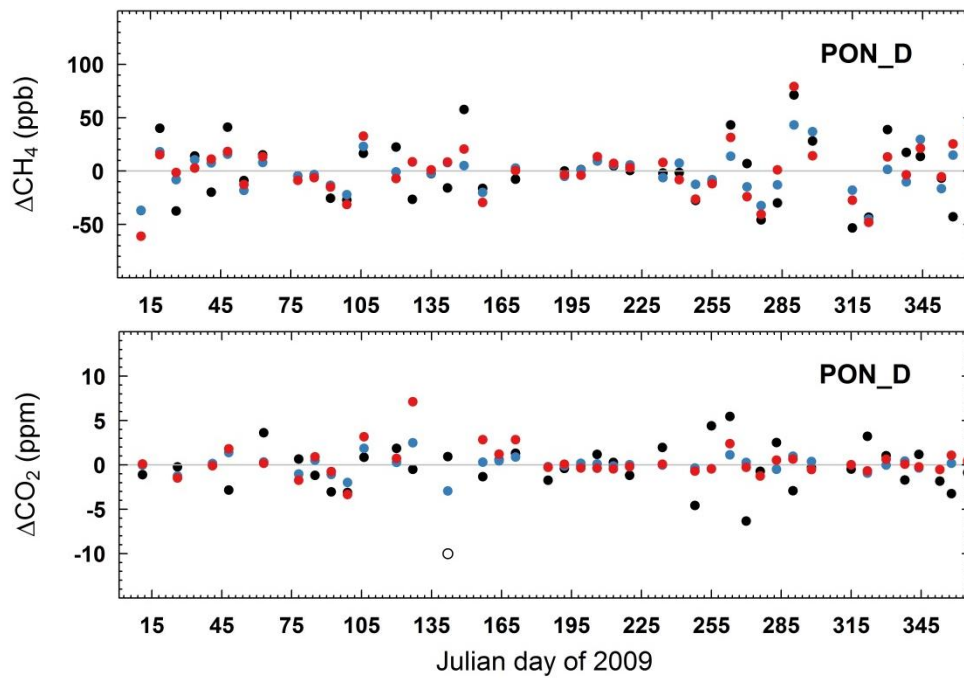

## Reference

Kurokawa, J., Ohara, T., Morikawa, T., Hanayama, S., Janssens-Maenhout, G., Fukui, T., Kawashima, K. and Akimoto, H.: Emissions of air pollutants and greenhouse gases over Asian regions during 2000–2008: Regional Emission inventory in ASia (REAS) version 2, *Atmos. Chem. Phys.*, 13(21), 11019–11058, doi:10.5194/acp-13-11019-2013, 2013.

Machida, T., Matsueda, H., Sawa, Y., Nakagawa, Y., Hirotsu, K., Kondo, N., Goto, K., Nakazawa, T., Ishikawa, K. and Ogawa, T.: Worldwide Measurements of Atmospheric CO<sub>2</sub> and Other Trace Gas Species Using Commercial Airlines, *J. Atmos. Ocean. Technol.*, 25(10), 1744–1754, doi:10.1175/2008JTECHA1082.1, 2008.
